# Supplementary material for: Novel asymmetrical azines appending 1,3,4-thiadiazole sulfonamide: synthesis, molecular structure analyses, in silico ADME, and cytotoxic effect
Source: Royal Society of Chemistry journal article supplement (doi:10.1039/d3ra00123g), 2023-01-01
Supplement: d3ra00123g1.pdf [file d3ra00123g1.pdf]

## Supplementary Data

### **Novel asymmetrical azines appending 1,3,4-thiadiazole sulfonamide: Synthesis, molecular structure analyses, *in silico* ADME, and cytotoxic effect**

Samir Bondock\*<sup>a,b</sup>, Tallah Albarqi<sup>a</sup>, Ibrahim A. Shaaban<sup>a,c</sup>, Moaz M. Abdou<sup>d</sup>

<sup>a</sup>Chemistry Department, Faculty of Science, King Khalid University, 9004 Abha, Saudi Arabia

<sup>b</sup>Chemistry Department, Faculty of Science, Mansoura University, 35516 Mansoura, Egypt

<sup>c</sup>Department of Chemistry, Faculty of Science (Men's Campus), Al-Azhar University, Nasr City  
11884, Cairo, Egypt

<sup>d</sup>Egyptian Petroleum Research Institute, Nasr City, 11727, Cairo, Egypt

#### **Correspondence**

Samir Bondock, Chemistry Department, Faculty of Science, Mansoura University, 35516 Mansoura,  
Egypt.

Email: [bondock@mans.edu.eg](mailto:bondock@mans.edu.eg)

## **1. Materials and instrumentation**

- 1) All melting points were determined on Stuart SMP11 apparatus and were uncorrected.
- 2) The IR spectra were recorded in KBr discs, on a Jasco FT/IR-460 plus spectrophotometer at College of Science, King Khalid University.
- 3) The  $^1\text{H}$ - and  $^{13}\text{C}$ -NMR spectra were recorded in  $\text{DMSO-d}_6$  at 850 MHz on a BrukerAvanceAV-850 NMRUltrshield™ spectrometer at King Abdulaziz University, Jeddah, Saudi Arabia.
- 4) Mass spectra were measured using the Shimadzu GC/MS-QP 1000 EX mass spectrometer at 70 eV, at the Micro Analytical Center, Cairo University, Giza, Egypt.
- 5) Elemental analyses were carried out at the Micro Analytical Center, Cairo University, Giza, Egypt.
- 6) Screening of the synthesized compounds in vitro against three human cancer cell lines: hepatocellular carcinoma (HepG-2), colon cancer (Caco-2), breast cancer (MCF-7) and one normal lung fibroblast (WI-38). The cell lines were obtained from American Type Culture Collection (ATCC) by the Holding company for biological products and vaccines (VACSERA), Giza, Egypt.

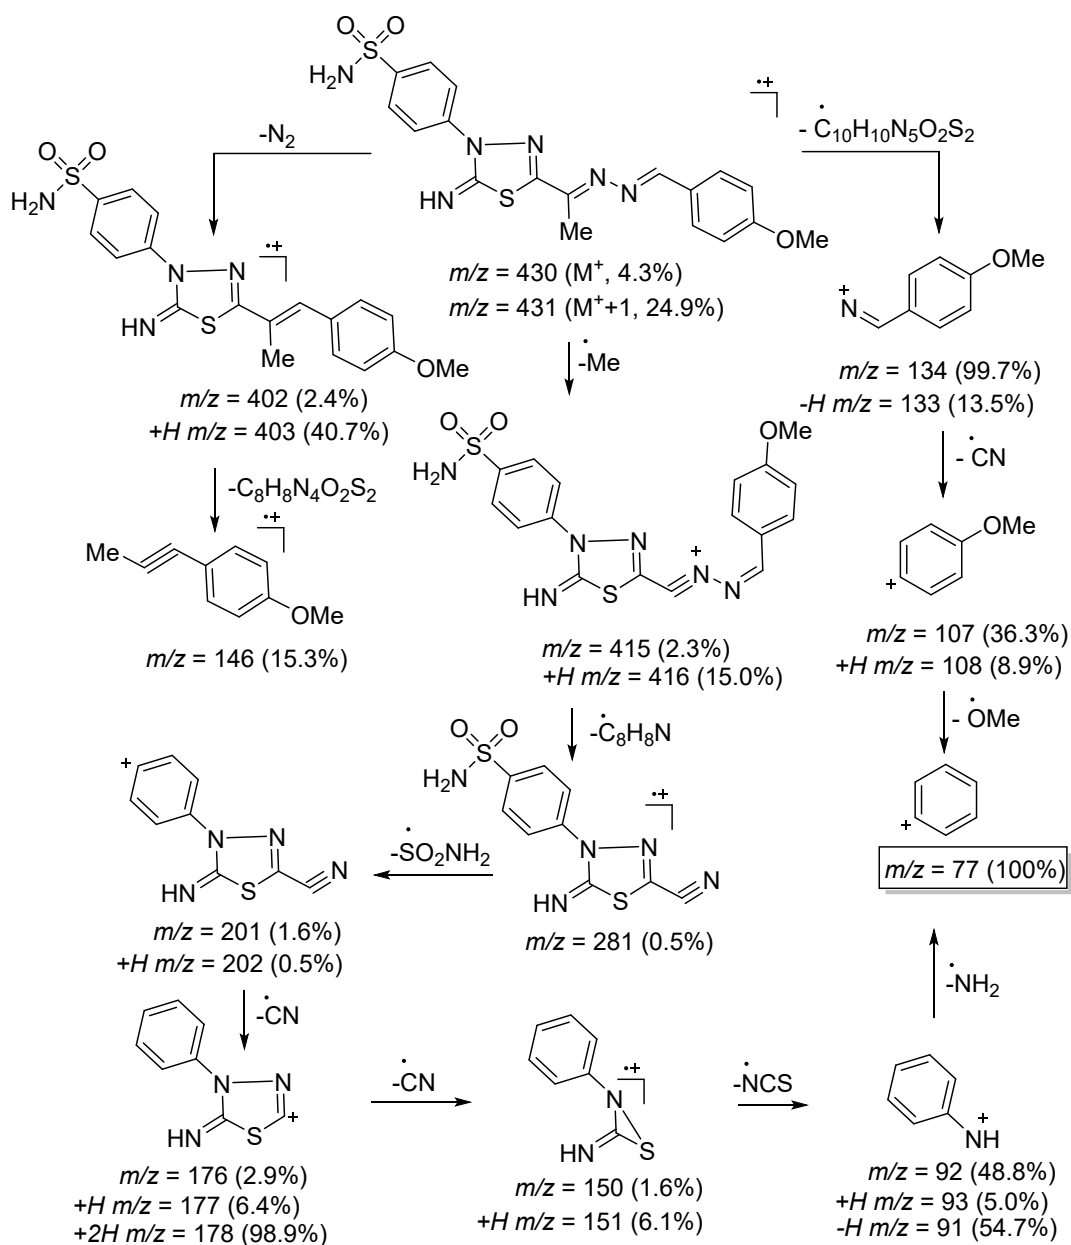

**Scheme 1.** Mass fragmentation pattern of compound **7a**.

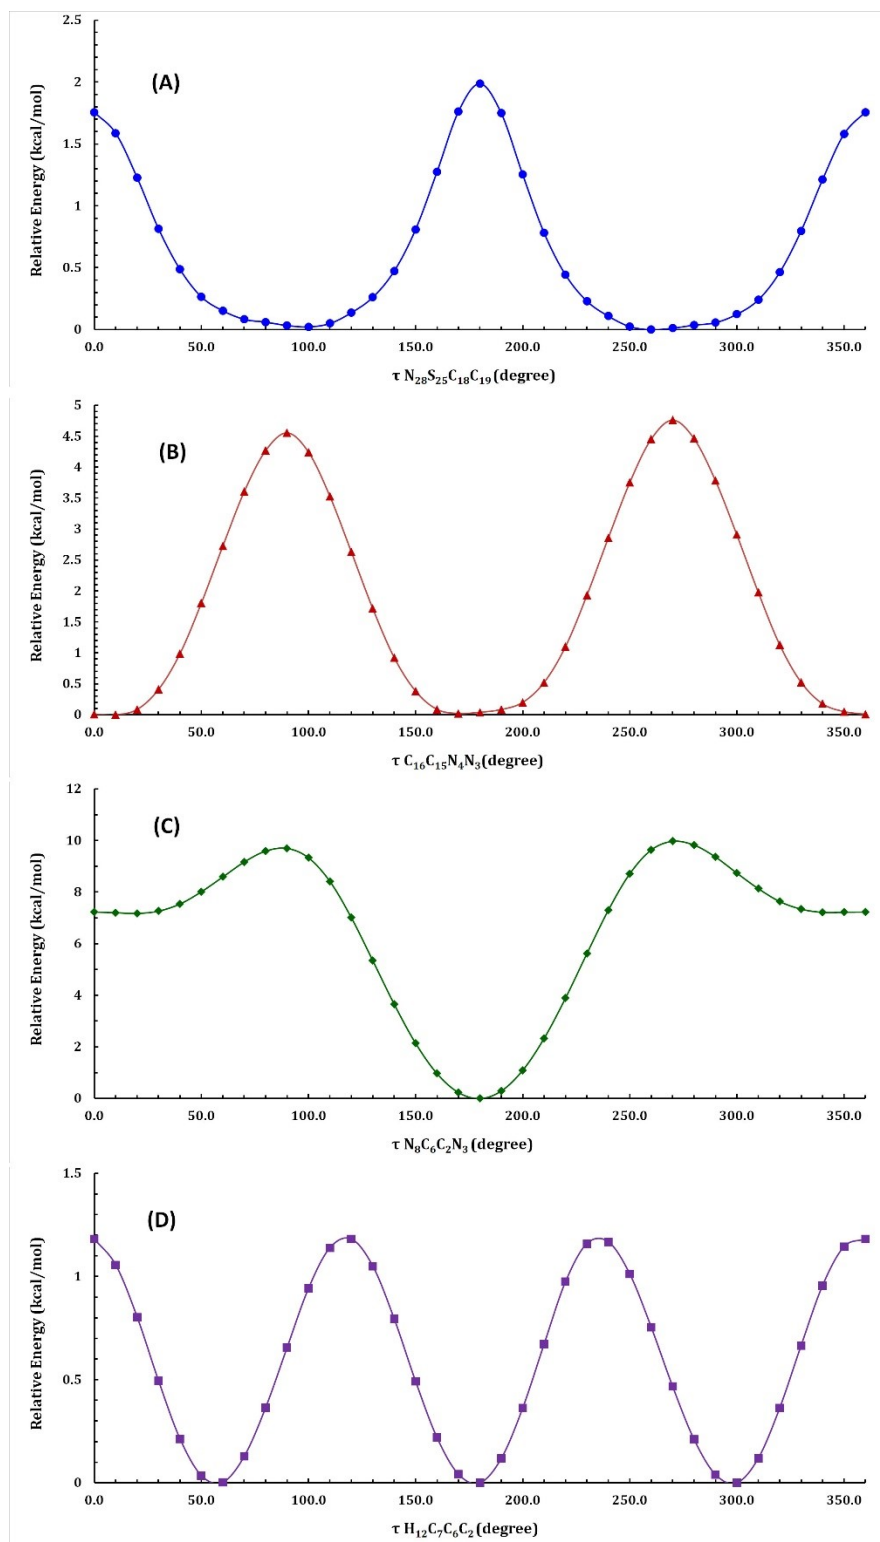

**Figure S1.** The computed PES for internal rotations in the E isomers of **5**; **(A)** sulfonamide moiety, **(B)** phenyl sulfonamide moiety, **(C)** C(CH<sub>3</sub>)NNH<sub>2</sub> moiety and **(D)** methyl moiety.

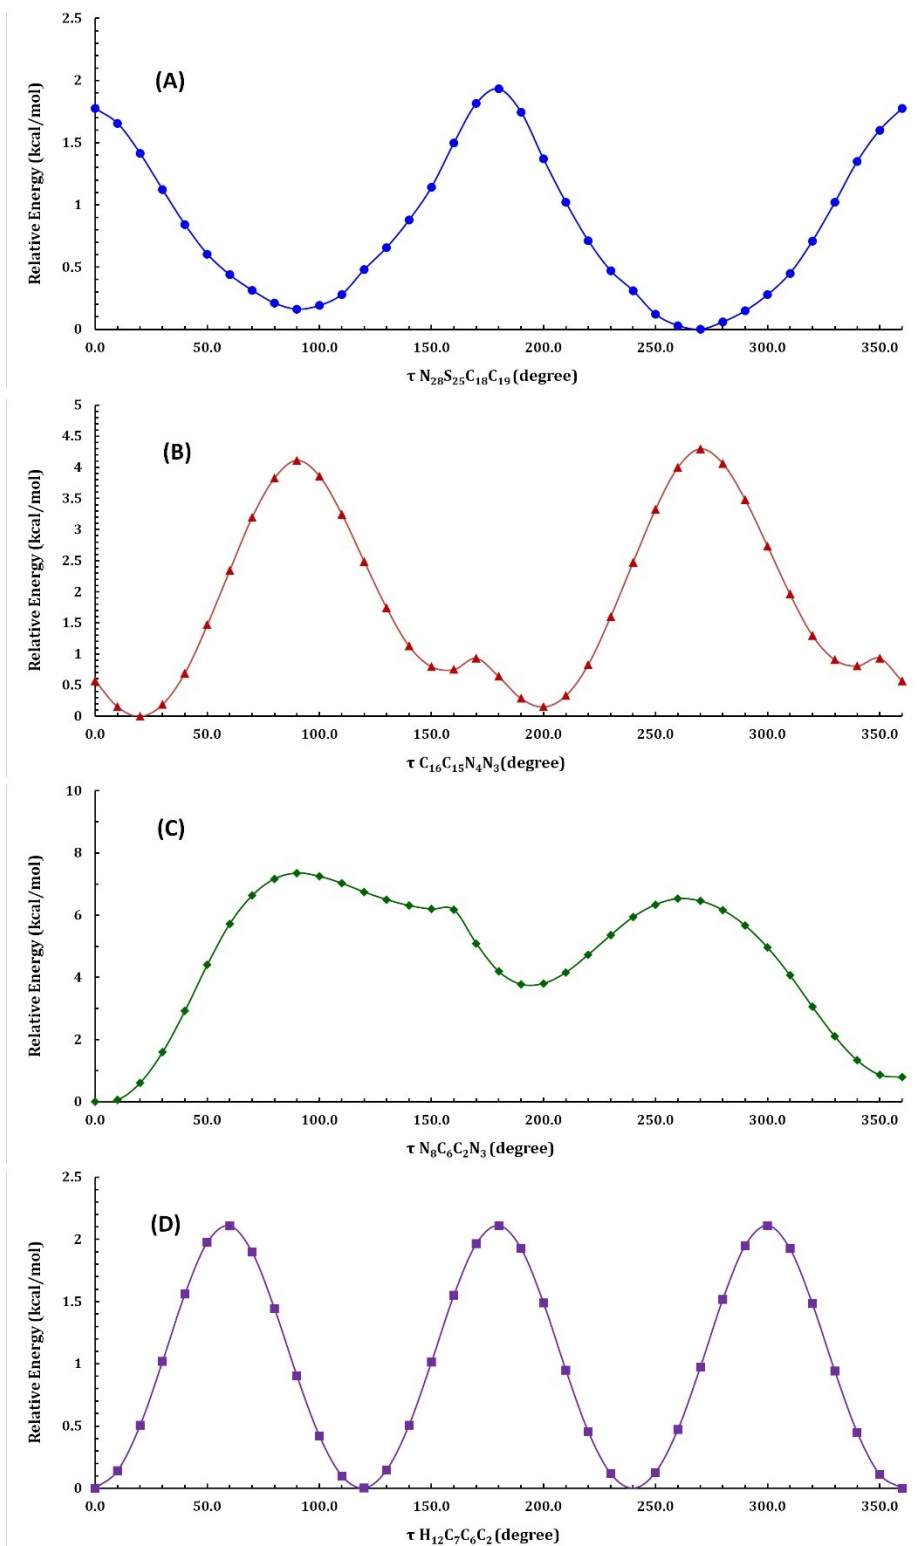

**Figure S2.** The computed PES for internal rotations in the Z isomers of **5**; **(A)** sulfonamide moiety, **(B)** phenyl sulfonamide moiety, **(C)**  $C(CH_3)NNH_2$  moiety and **(D)** methyl moiety.

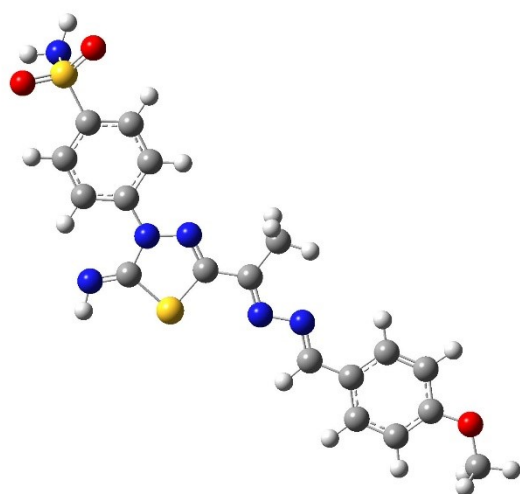

**1 (*EE* isomer)**  
HF= -2047.174609

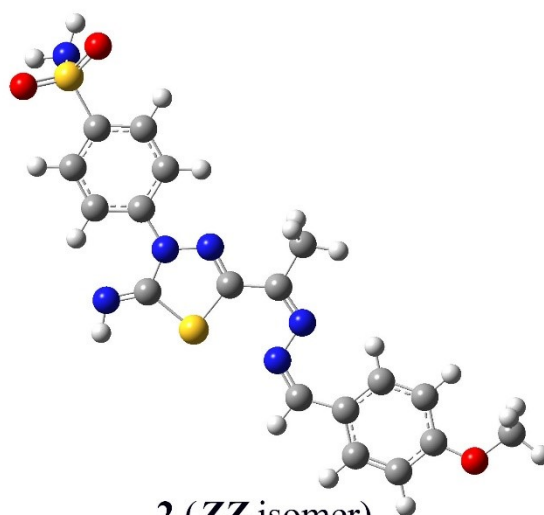

**2 (*ZZ* isomer)**  
HF= -2047.166237

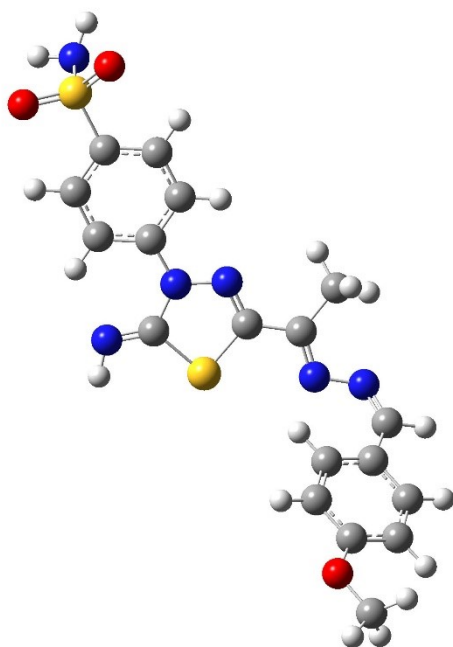

**3 (*EZ* isomer)**  
HF= -2047.168535

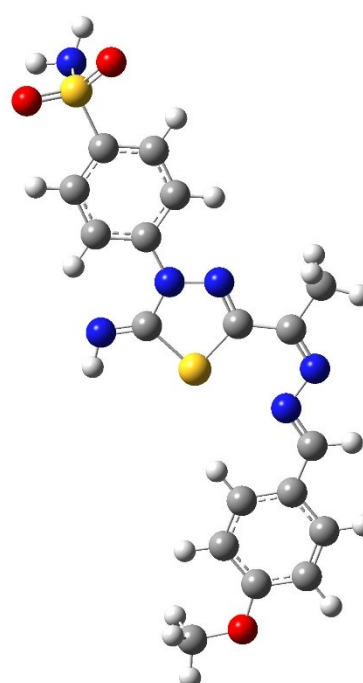

**4 (*ZE* isomer)**  
HF= -2047.171529

**Figure S3.** Optimized geometries for the proposed configurations of compound **7a** obtained from B3LYP/6-31G(d) calculations.

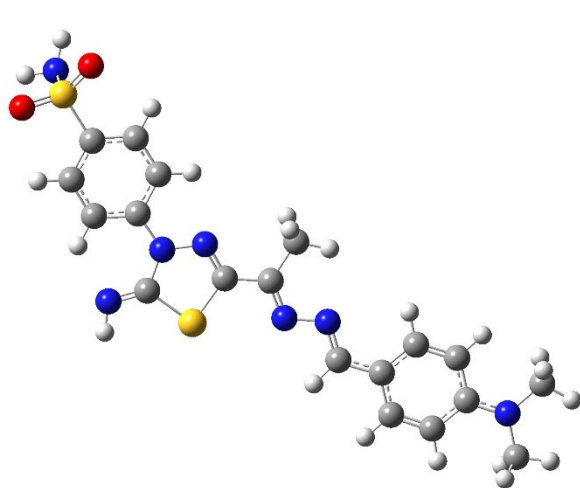

**1** (*EE* isomer)  
HF= -2066.621509

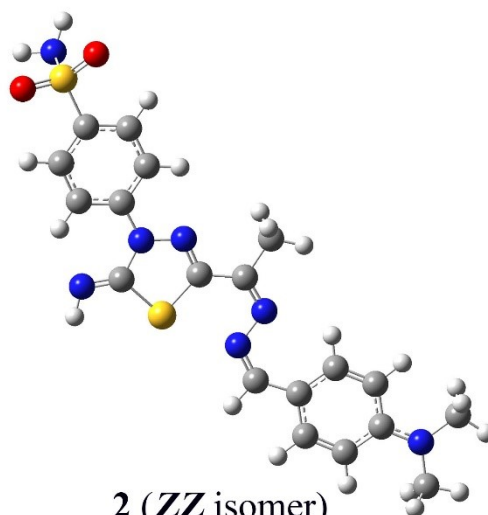

**2** (*ZZ* isomer)  
HF= -2066.613383

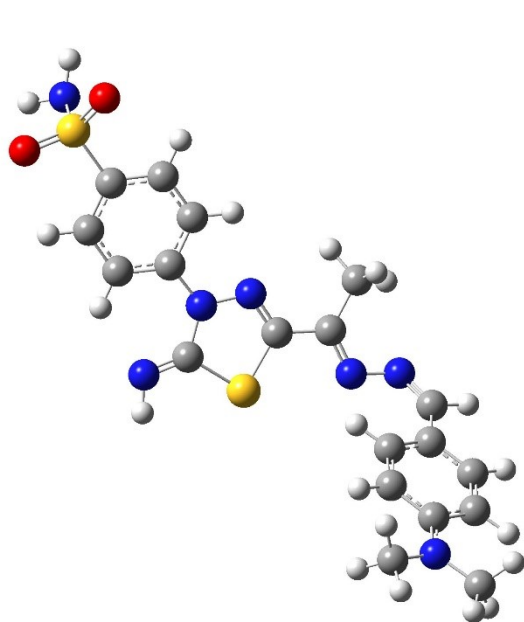

**3** (*EZ* isomer)  
HF= -2066.615461

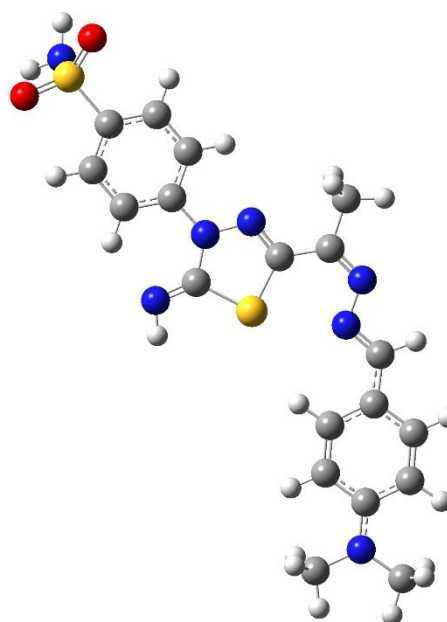

**4** (*ZE* isomer)  
HF= -2066.618754

**Figure S4.** Optimized geometries for the proposed configurations of compound **7b** obtained from B3LYP/6-31G(d) calculations.

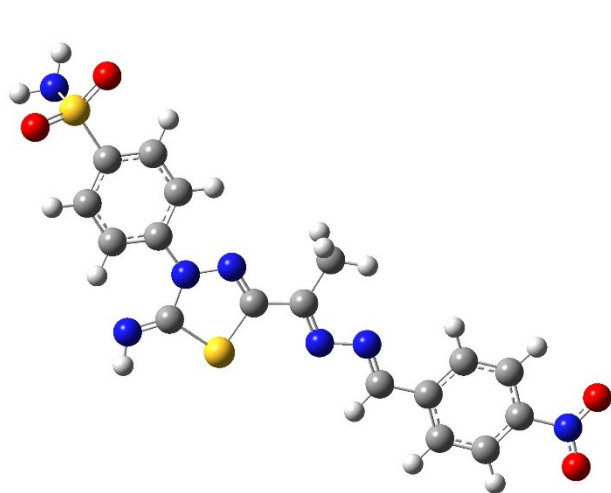

**1 (*EE* isomer)**  
HF= -2137.148645

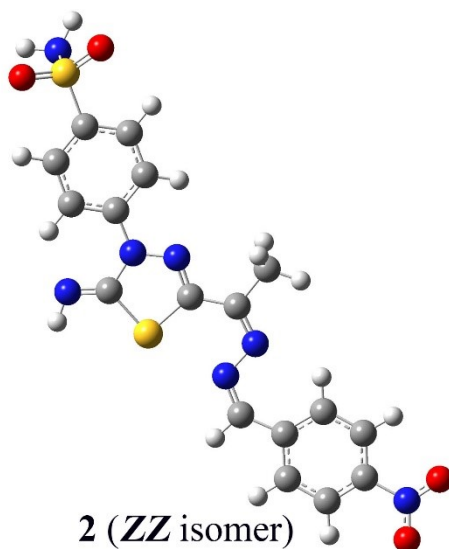

**2 (*ZZ* isomer)**  
HF= -2137.139759

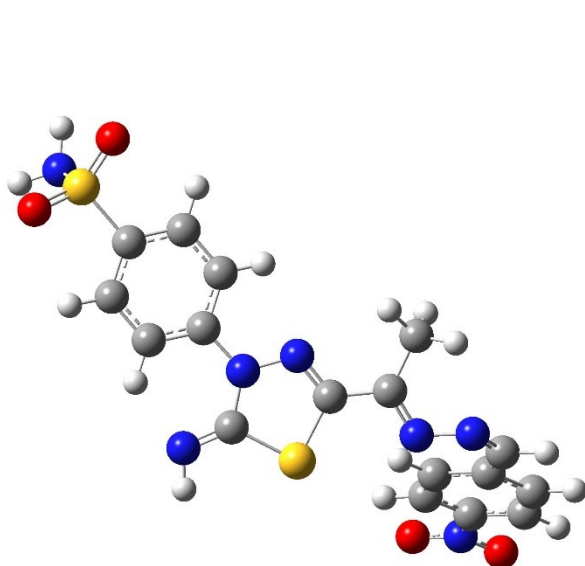

**3 (*EZ* isomer)**  
HF= -2137.142714

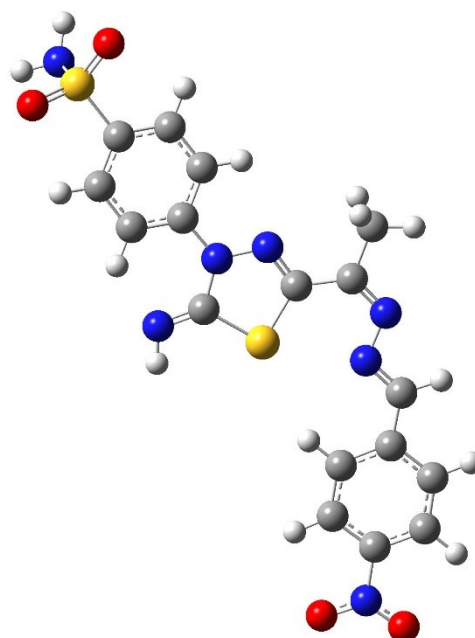

**4 (*ZE* isomer)**  
HF= -2137.145381

**Figure S5.** Optimized geometries for the proposed configurations of compound **7c** obtained from B3LYP/6-31G(d) calculations.



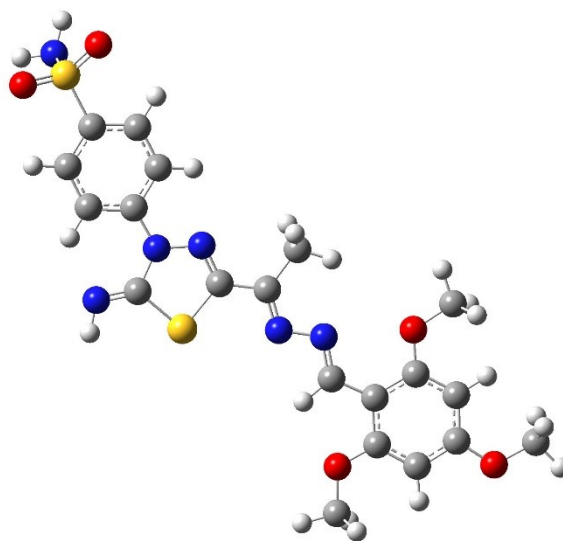

**1 (*EE* isomer)**  
HF= -2276.213429

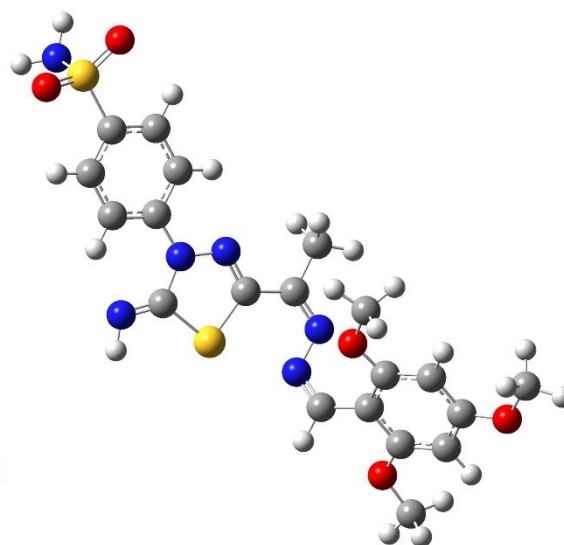

**2 (*ZZ* isomer)**  
HF= -2276.204309

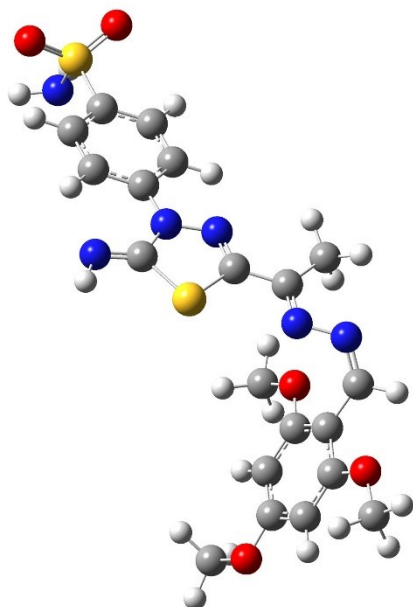

**3 (*EZ* isomer)**  
HF= -2276.207865

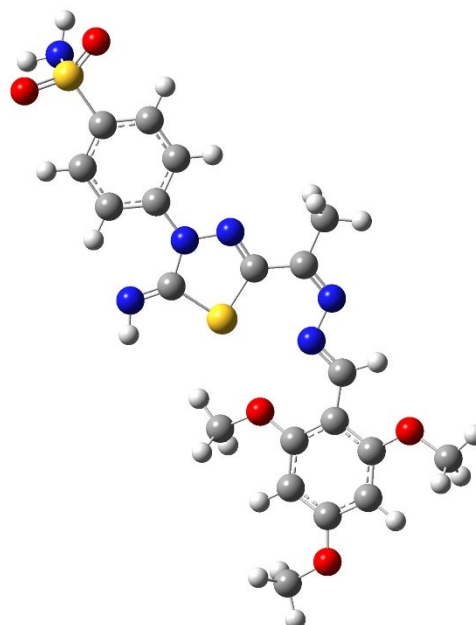

**4 (*ZE* isomer)**  
HF= -2276.210618

**Figure S6.** Optimized geometries for the proposed configurations of compound **9** obtained from B3LYP/6-31G(d) calculations.

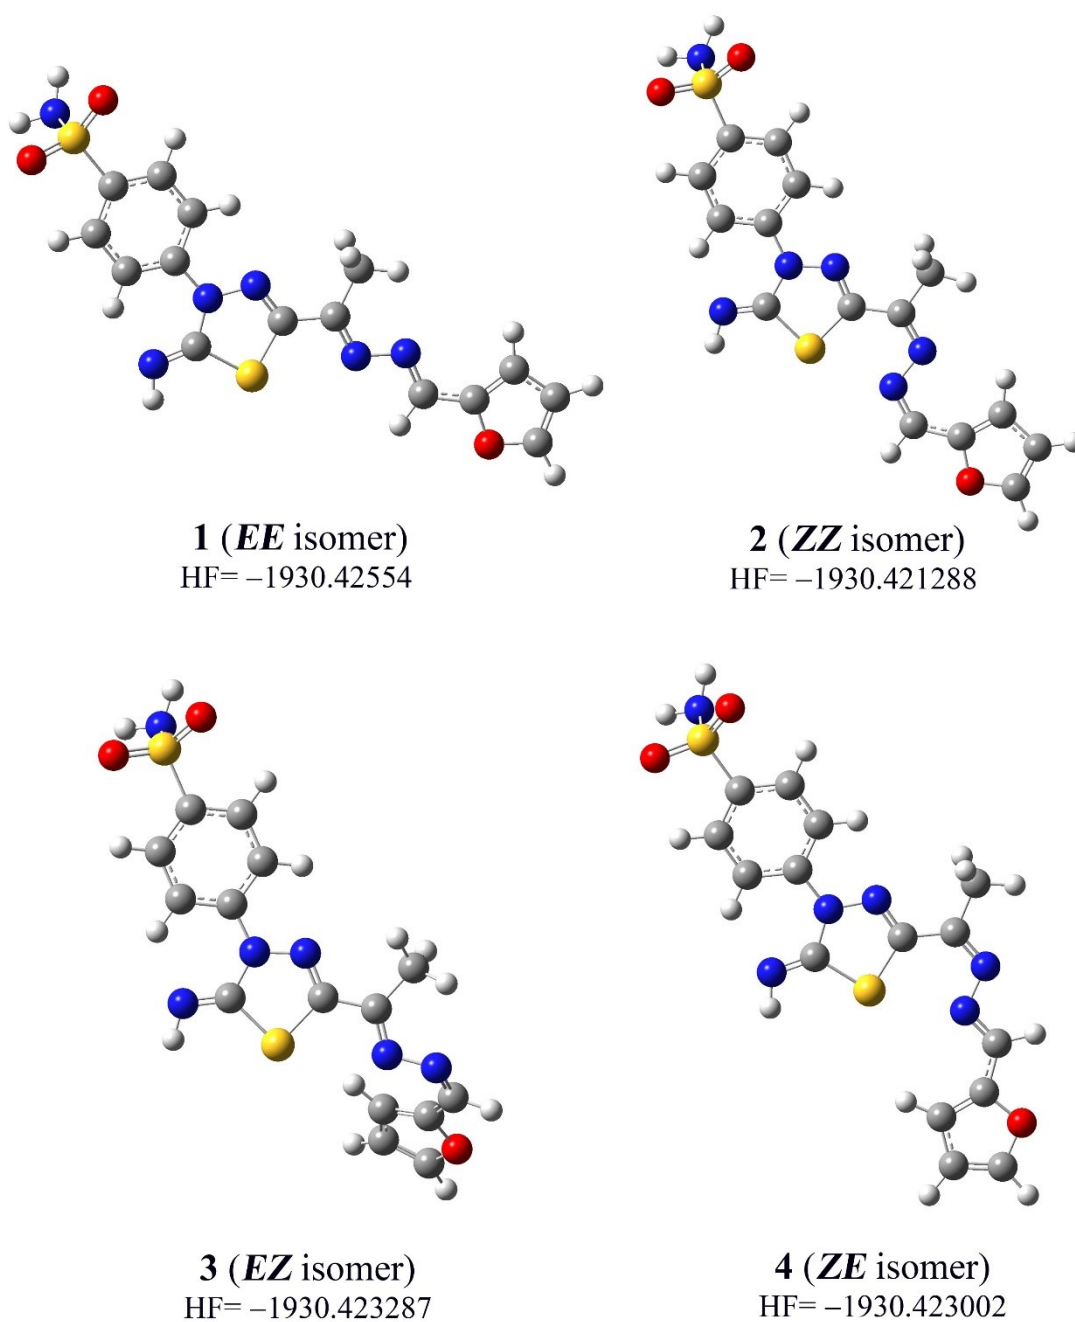

**Figure S7.** Optimized geometries for the proposed configurations of compound **11** obtained from B3LYP/6-31G(d) calculations.

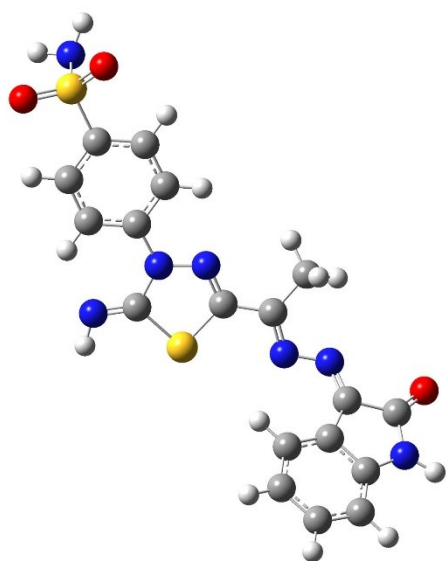

**1 (*EE* isomer)**  
HF= -2100.141412

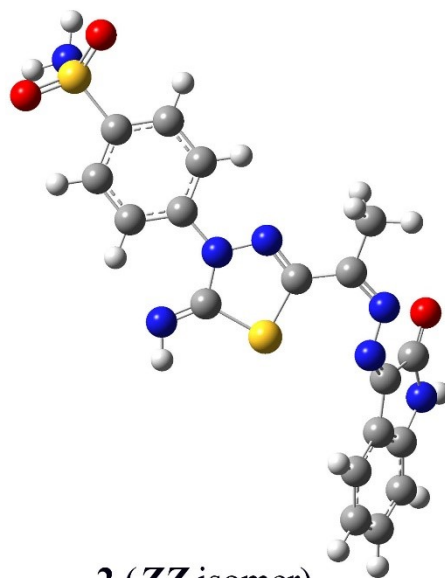

**2 (*ZZ* isomer)**  
HF= -2100.136203

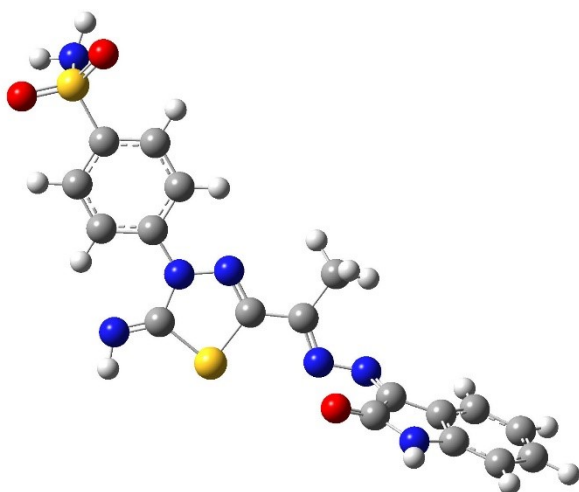

**3 (*EZ* isomer)**  
HF= -2100.140941

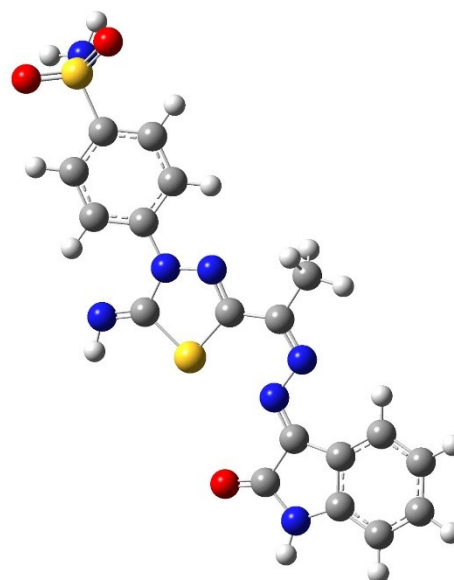

**4 (*ZE* isomer)**  
HF= -2100.140155

**Figure S8.** Optimized geometries for the proposed configurations of compound **13** obtained from B3LYP/6-31G(d) calculations.

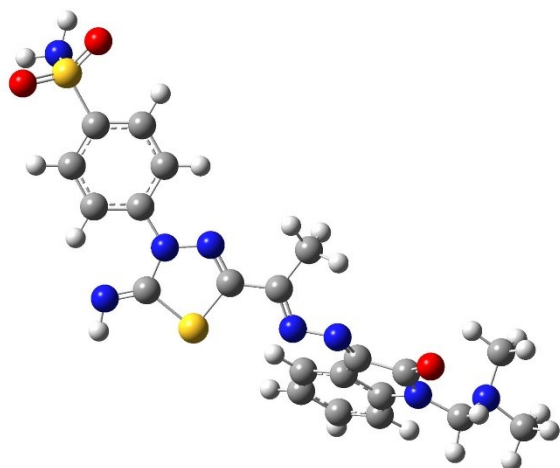

**1 (*EE* isomer)**  
HF= -2273.419471

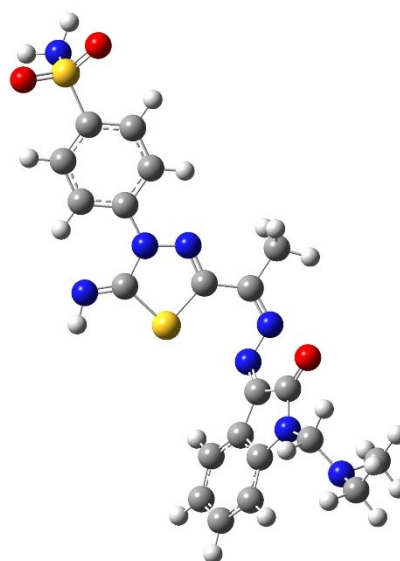

**2 (*ZZ* isomer)**  
HF= -2273.414291

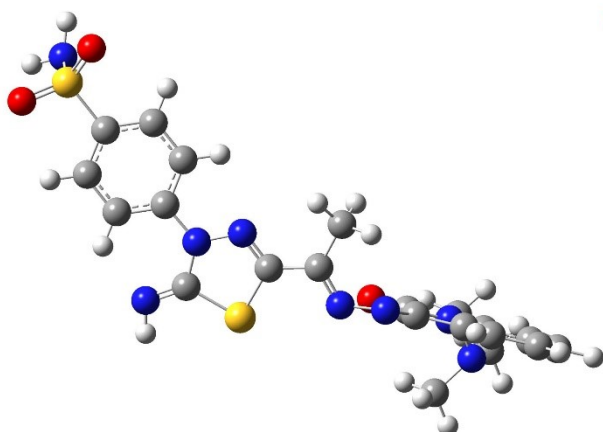

**3 (*EZ* isomer)**  
HF= -2273.419083

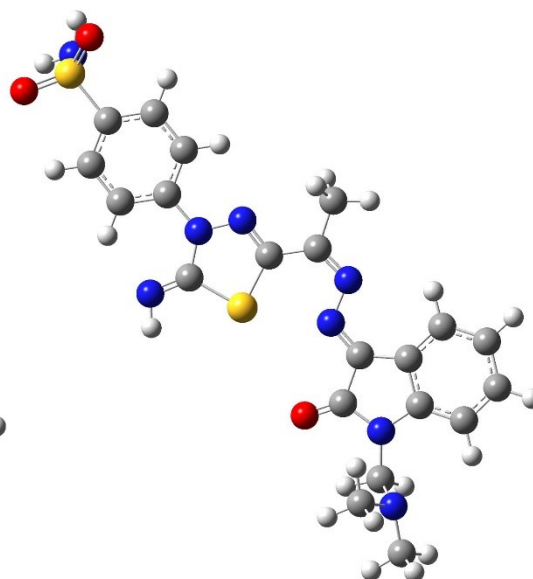

**4 (*ZE* isomer)**  
HF= -2273.41831

**Figure S9.** Optimized geometries for the proposed configurations of compound **15a** obtained from B3LYP/6-31G(d) calculations.

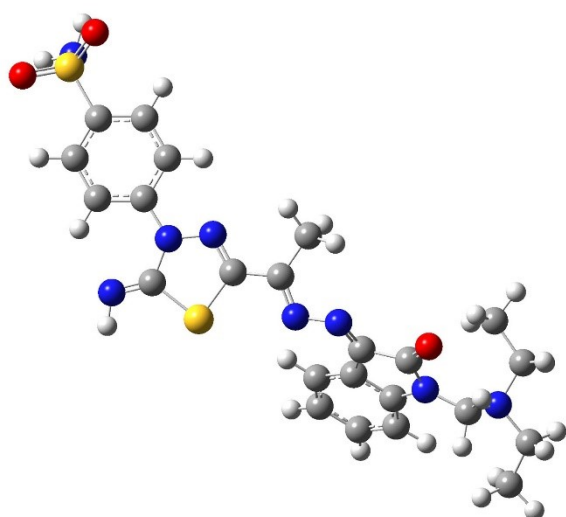

**1 (*EE* isomer)**  
HF= -2352.04409

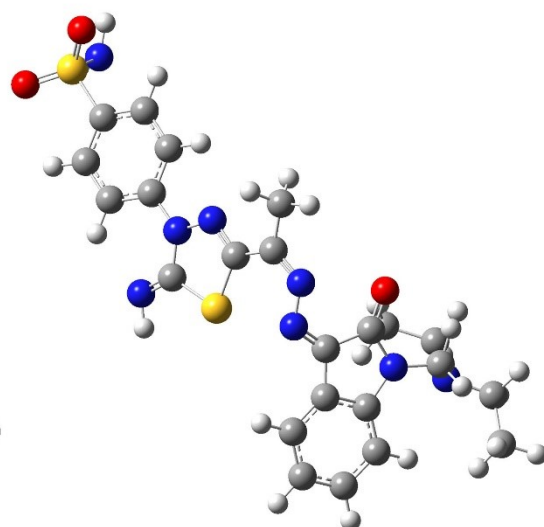

**2 (*ZZ* isomer)**  
HF= -2352.038863

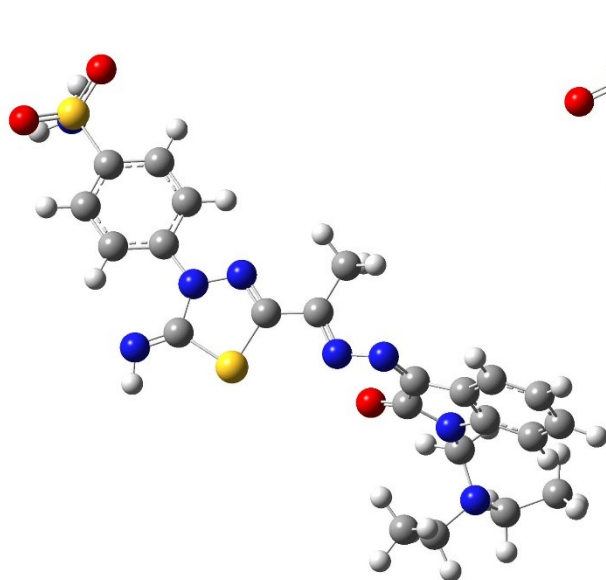

**3 (*EZ* isomer)**  
HF= -2352.043659

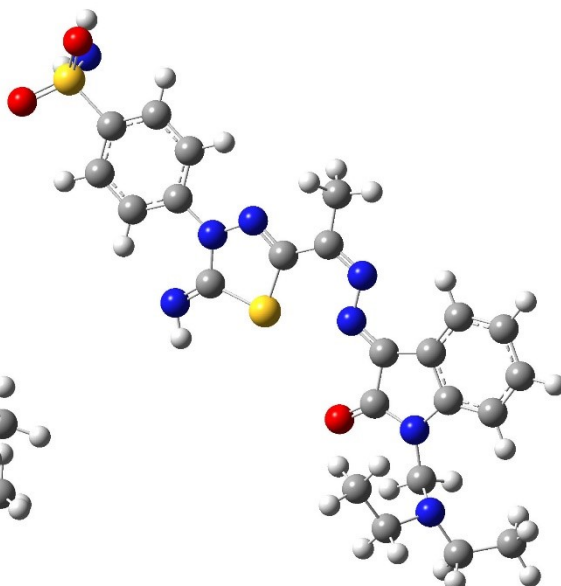

**4 (*ZE* isomer)**  
HF= -2352.042893

**Figure S10.** Optimized geometries for the proposed configurations of compound **15b** obtained from B3LYP/6-31G(d) calculations.

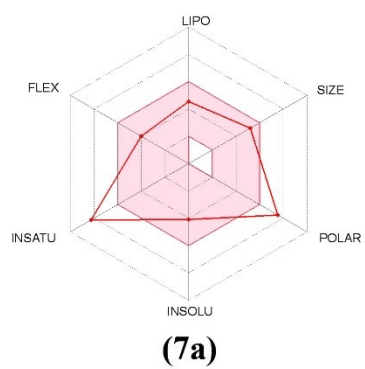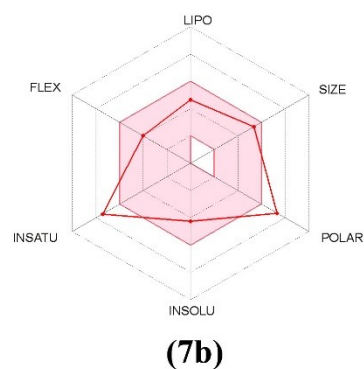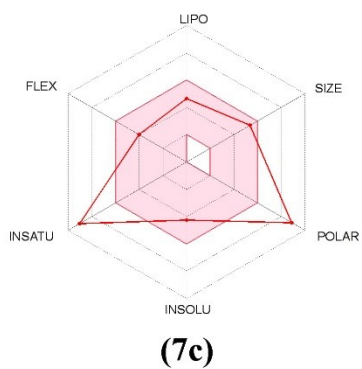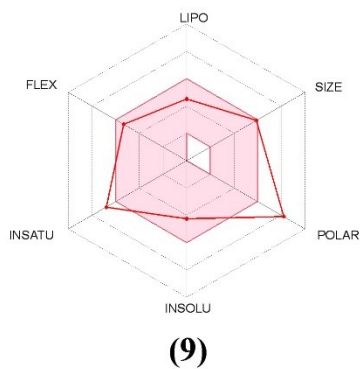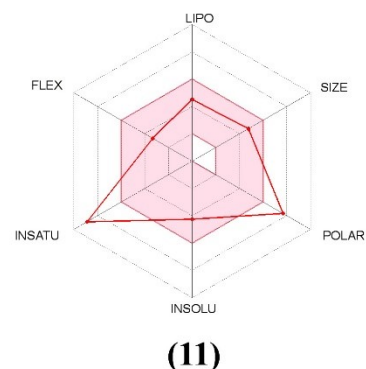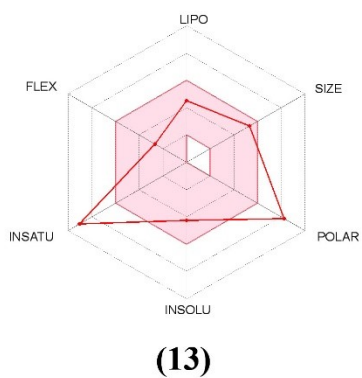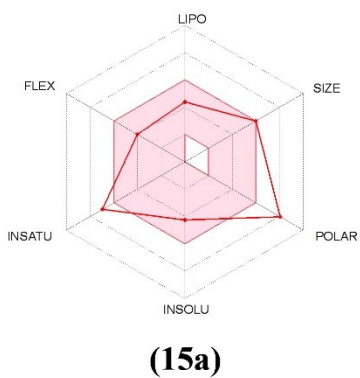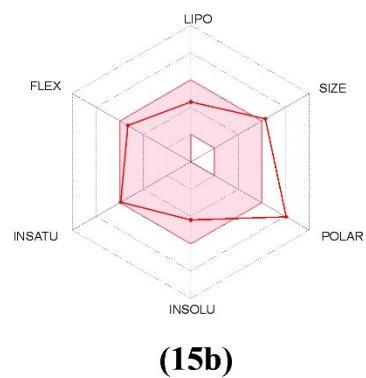

**Figure S11.** Swiss ADME's bioavailability radar of the synthesized compounds.

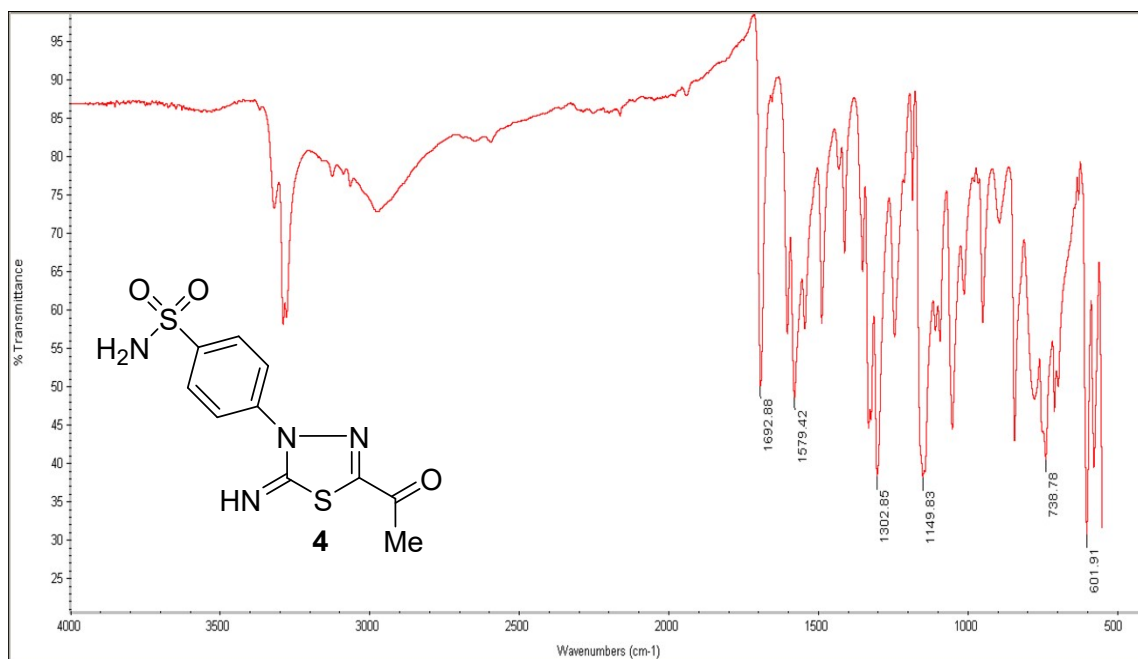

Figure S12. IR spectrum of compound 4

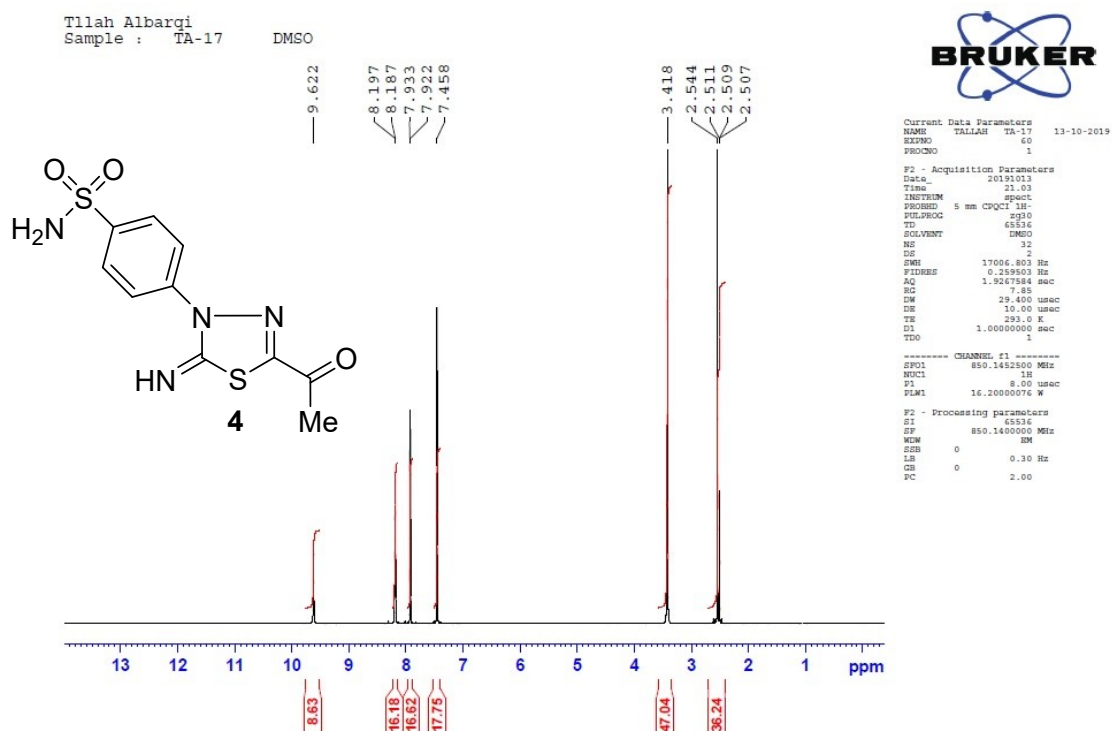

Figure S13. <sup>1</sup>H-NMR spectrum of compound 4.

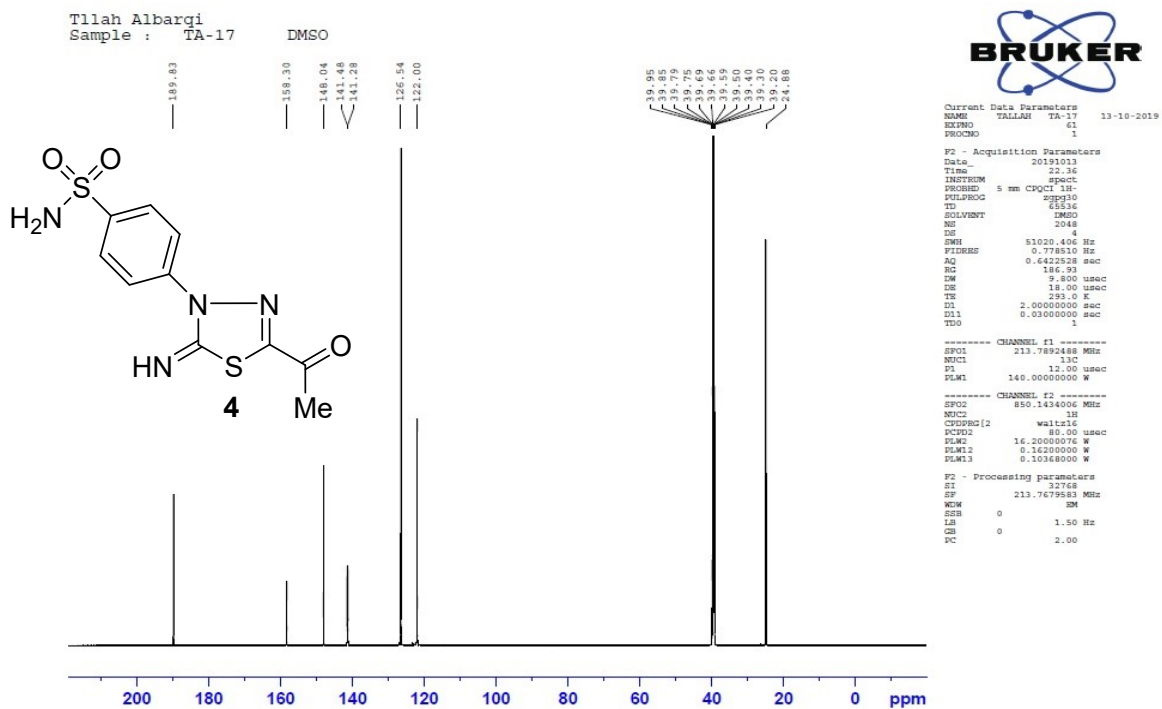

Figure S14.  $^{13}\text{C}$ -NMR spectrum of compound 4.

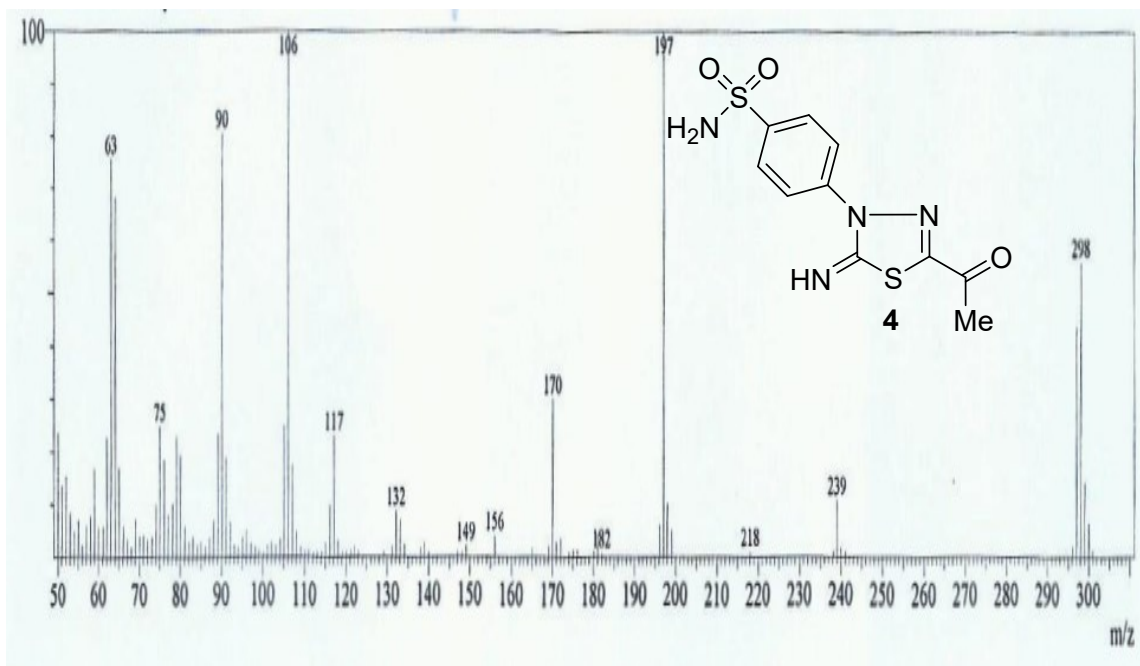

Figure S15. Mass spectrum of compound 4.



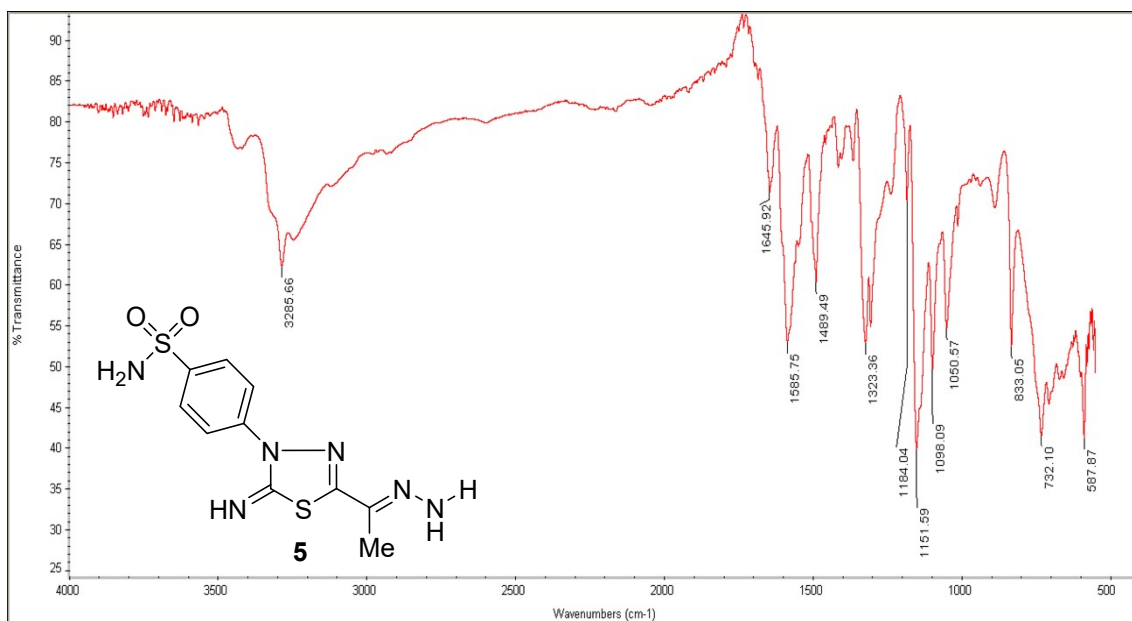

Figure S16. IR spectrum of compound 5.

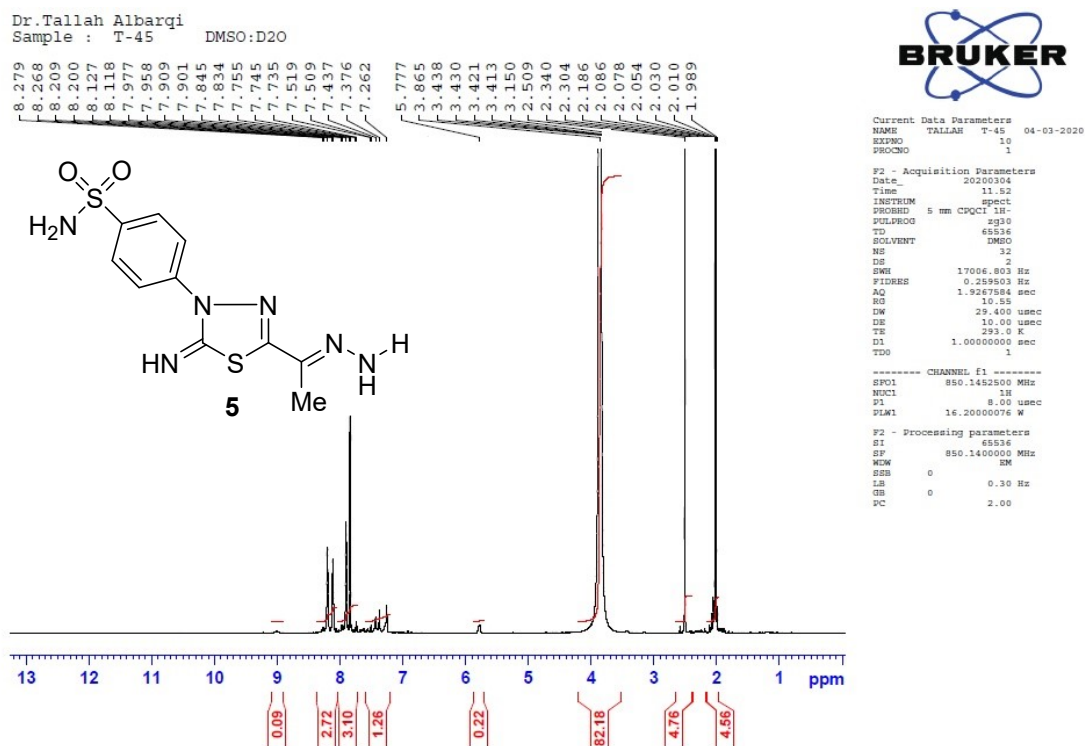

Figure S17. <sup>1</sup>H-NM spectrum of compound 5.

Dr. Tallah Albarqi  
Sample T-45 DMSO

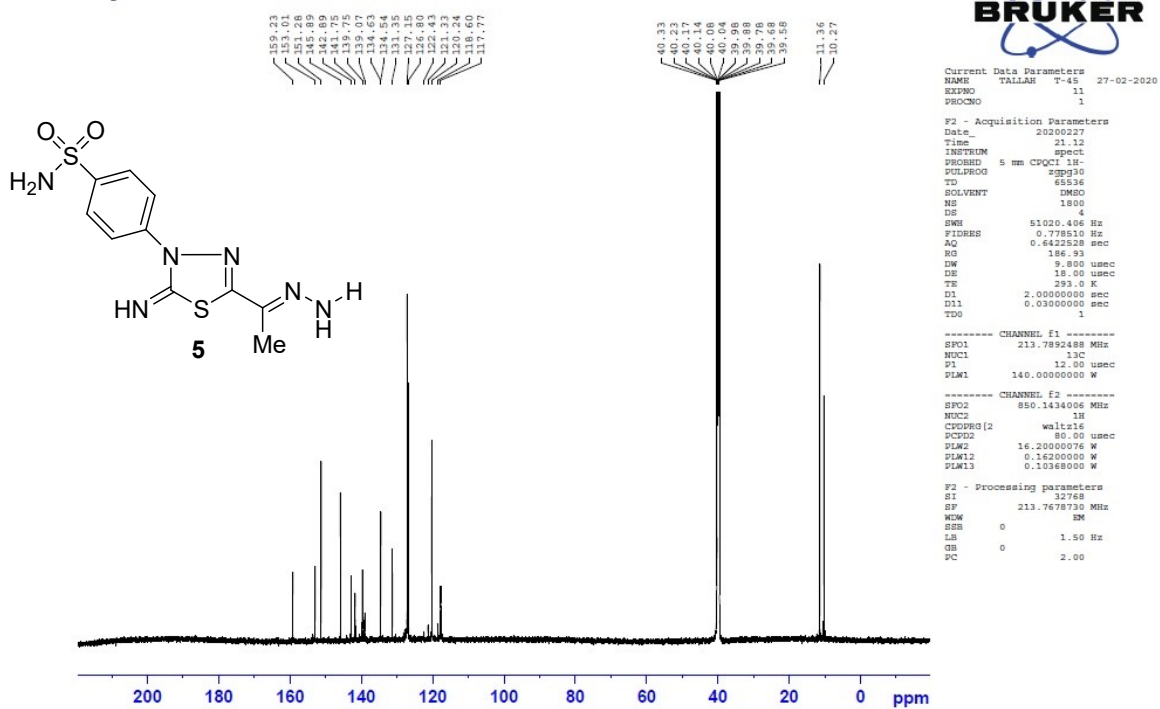

Figure S18. <sup>13</sup>C-NMR spectrum of compound 5.

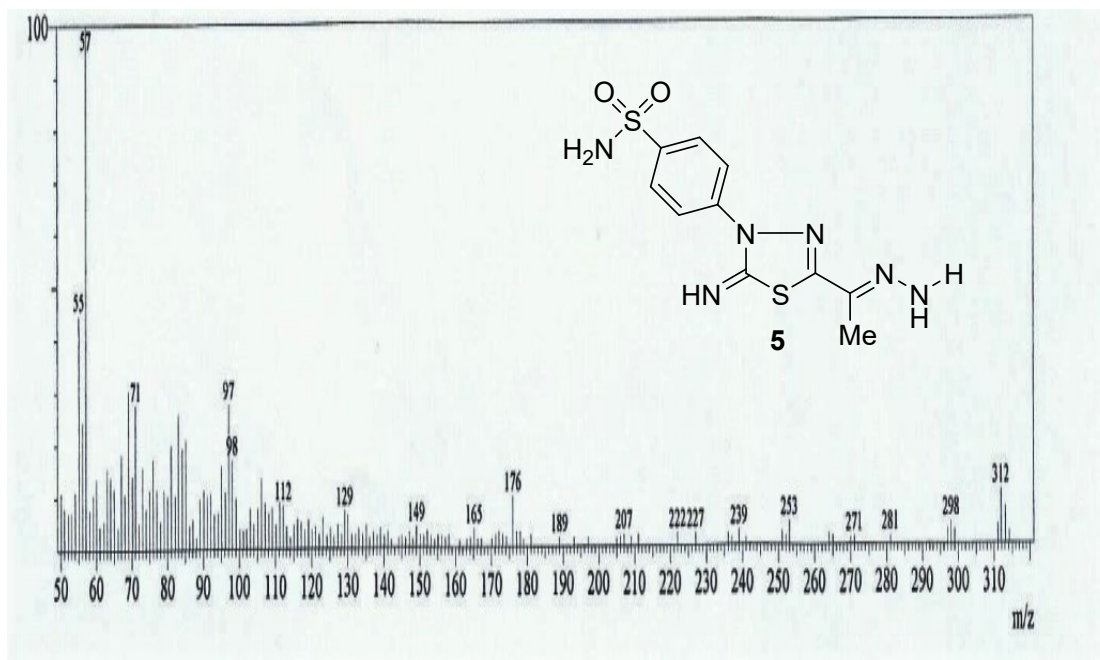

Figure S19. Mass spectrum of compound 5.

Tallah Albarqi  
Sample TM-34 DMSO

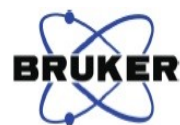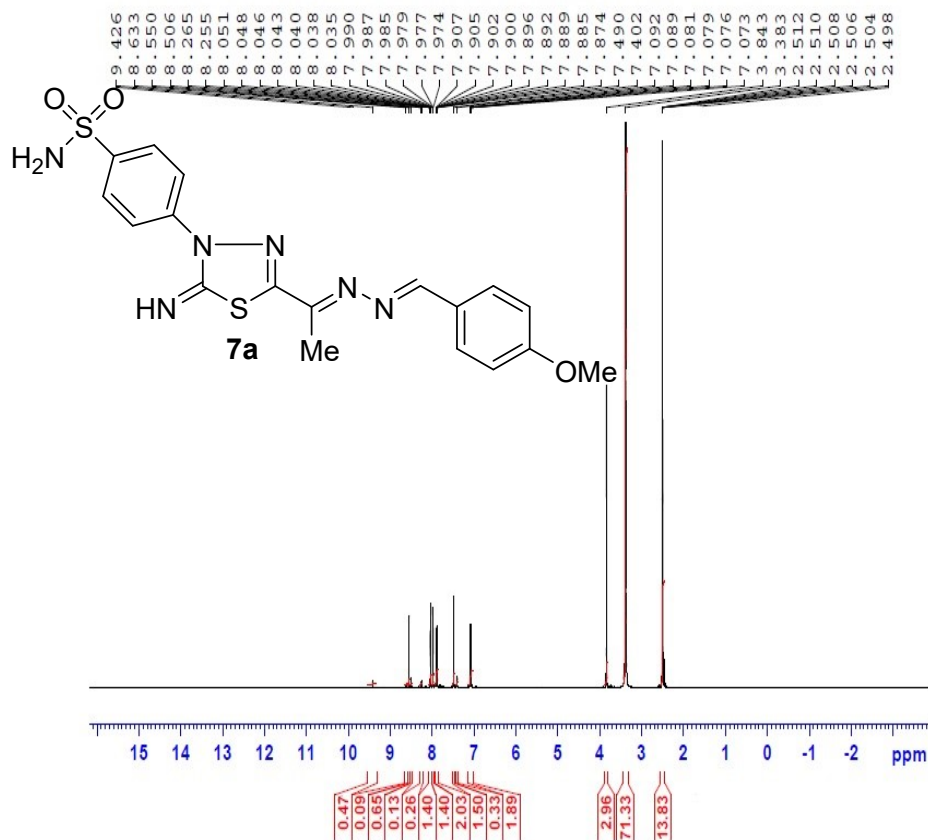

Current Data Parameters  
NAME TALLAH TM-34 20-12-2020  
EXPNO 80  
PROCNO 1

F2 - Acquisition Parameters  
Date\_ 20201221  
Time 8.13  
INSTRUM spect  
PROBHD 5 mm CPQCI 1H-  
PULPROG zg30  
TD 65536  
SOLVENT DMSO  
NS 32  
DS 2  
SWH 17006.803 Hz  
FIDRES 0.259503 Hz  
AQ 1.9267584 sec  
RG 11.37  
DW 29.400 usec  
DE 10.00 usec  
TE 298.0 K  
D1 1.00000000 sec  
TDO 1

----- CHANNEL f1 -----  
SFO1 850.1552500 MHz  
NUC1 1H  
P1 8.00 usec  
PLW1 16.70000076 W

F2 - Processing parameters  
SI 65536  
SF 850.1500000 MHz  
WDW EM  
SFB 0  
LB 0.30 Hz  
GB 0  
PC 2.00

Figure S20. <sup>1</sup>H-NMR spectrum of compound 7a.

Tallah Albarqi  
Sample TM-34 DMSO

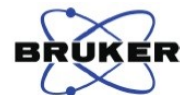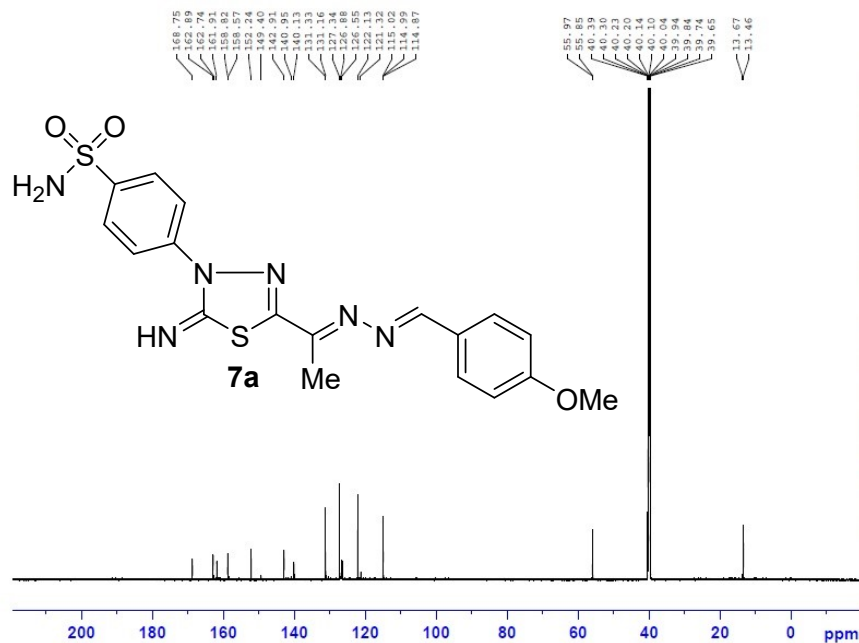

Current Data Parameters  
NAME TALLAH TM-34 20-12-2020  
EXPNO 82  
PROCNO 1

F2 - Acquisition Parameters  
Date\_ 20201221  
Time 9.47  
INSTRUM spect  
PROBHD 5 mm CPQCI 1H-  
PULPROG zgpg30  
TD 65536  
SOLVENT DMSO  
NS 2048  
DS 4  
SWH 51030.406 Hz  
FIDRES 0.778510 Hz  
AQ 0.6422528 sec  
RG 186.93  
DW 9.800 usec  
DE 18.00 usec  
TE 298.0 K  
D1 2.00000000 sec  
D11 0.03000000 sec  
TDO 1

----- CHANNEL f1 -----  
SFO1 213.7917636 MHz  
NUC1 13C  
P1 45.00 usec  
PLW1 12.00000000 W

----- CHANNEL f2 -----  
SFO2 850.1334006 MHz  
NUC2 1H  
CFORH2[2] waltz16  
PCPD2 80.00 usec  
PLW2 16.70000076 W  
PLW12 0.16700000 W  
PLW13 0.10688000 W

F2 - Processing parameters  
SI 32768  
SF 213.7763878 MHz  
WDW EM  
SFB 0  
LB 1.00 Hz  
GB 0  
PC 2.00

Figure S21. <sup>13</sup>C-NMR spectrum of compound 7a.

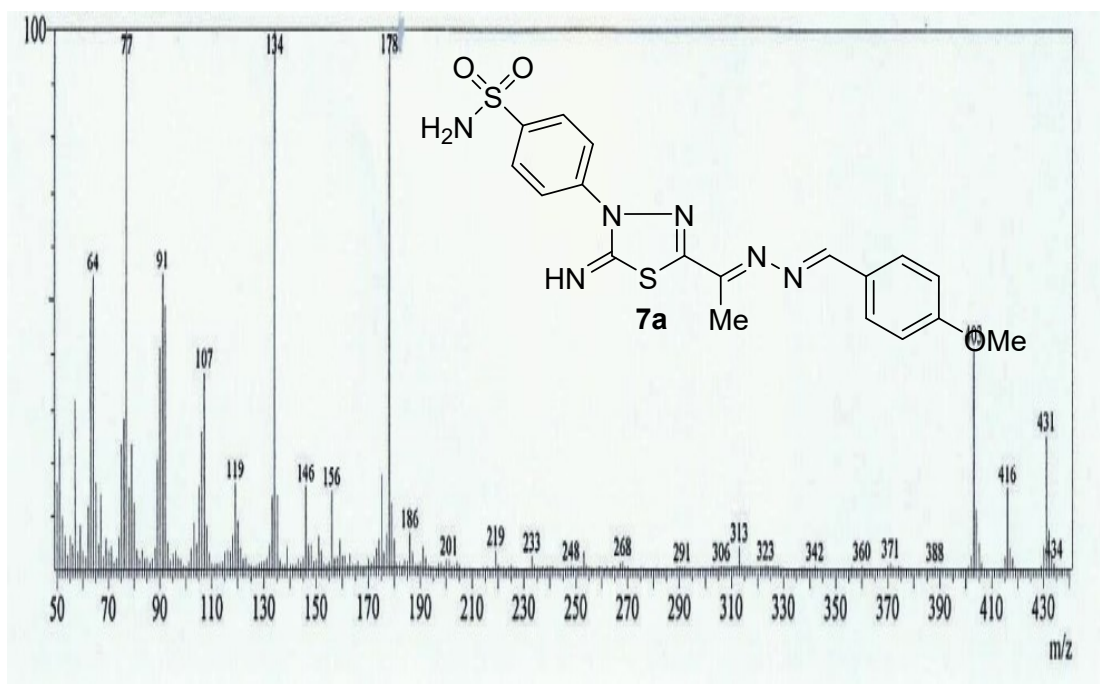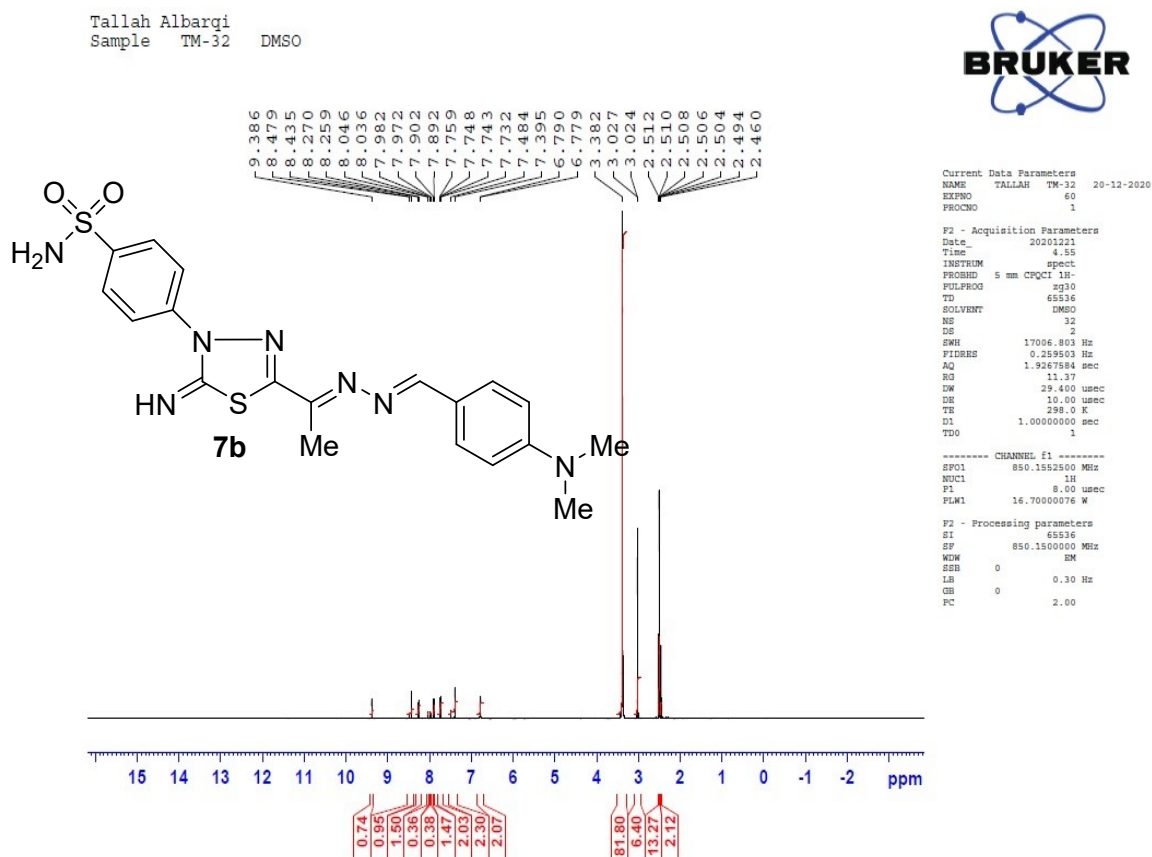

Tallah Albarqi  
Sample TM-32 DMSO

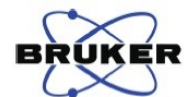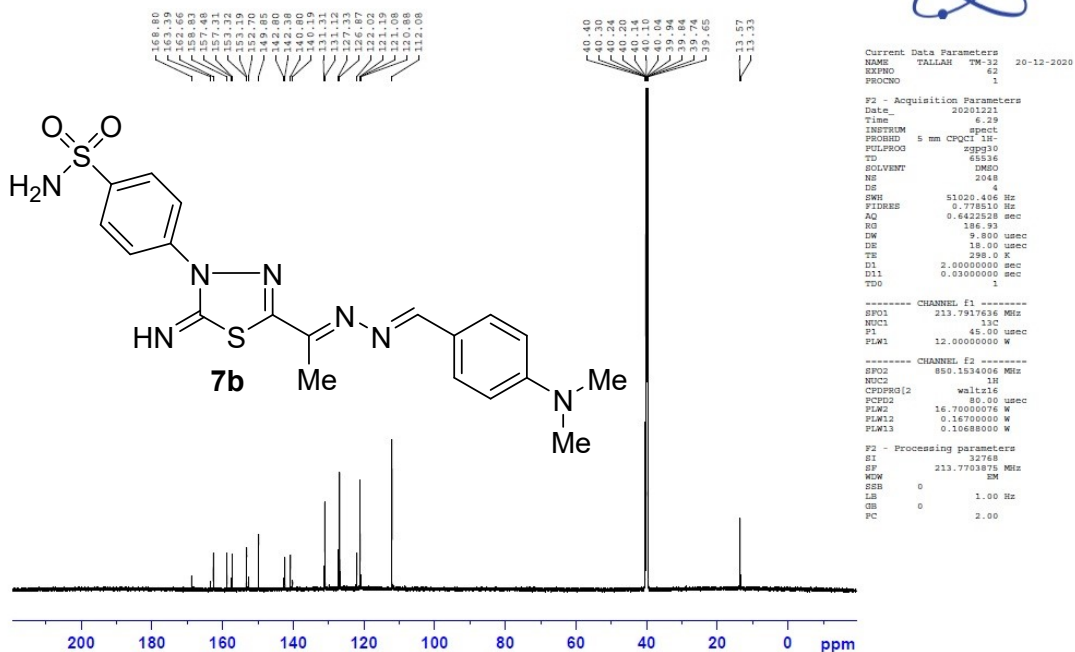

Figure S24. <sup>13</sup>C-NMR spectrum of compound 7b.

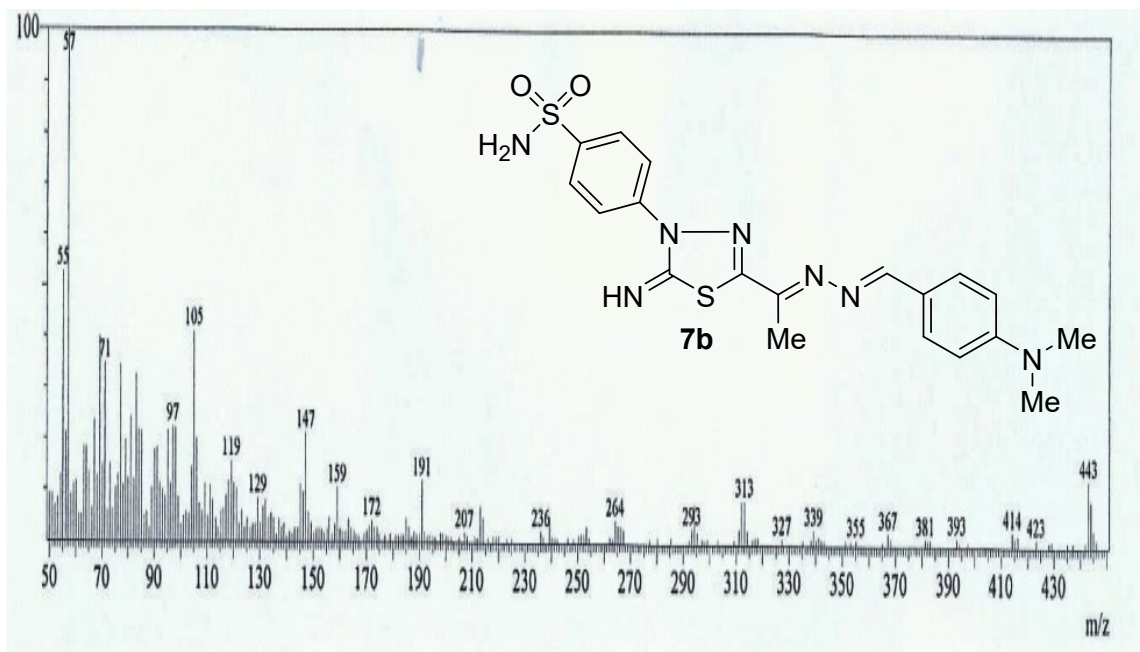

Figure S25. Mass spectrum of compound 7b.

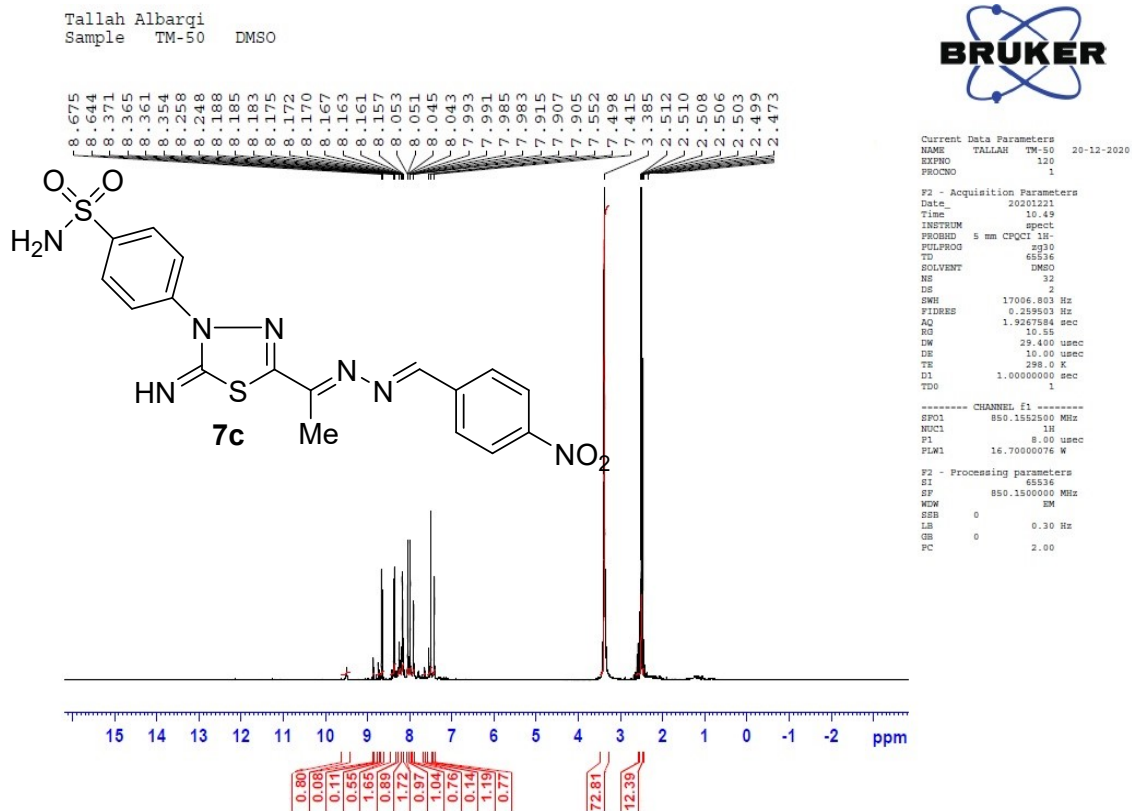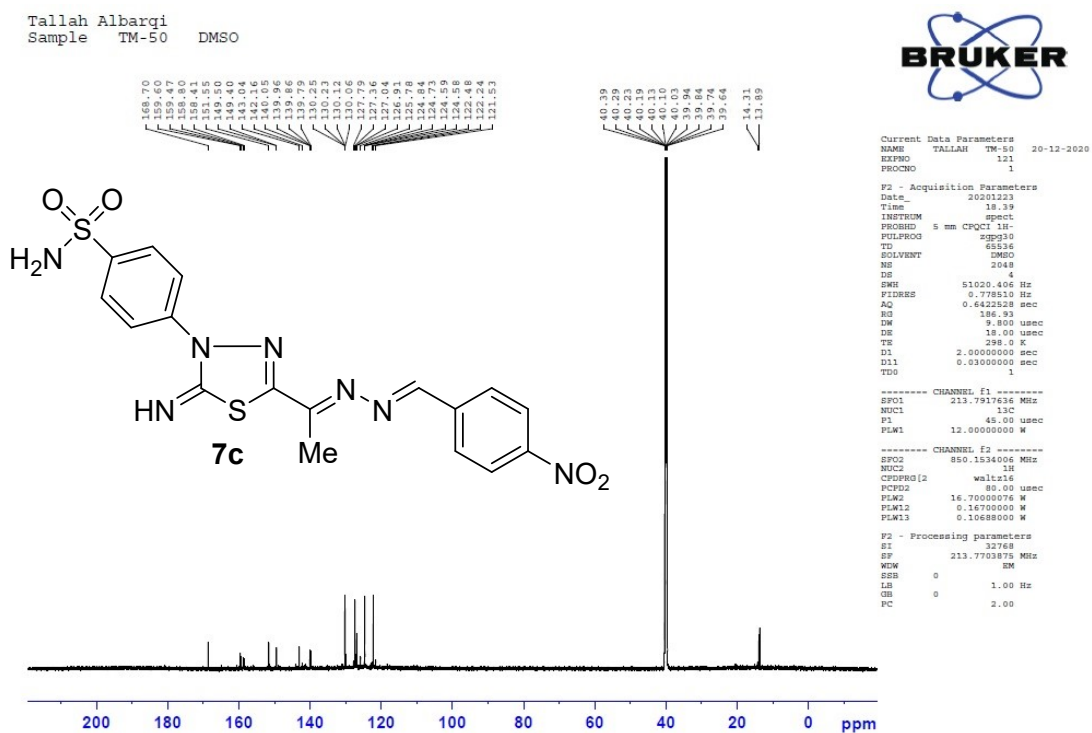

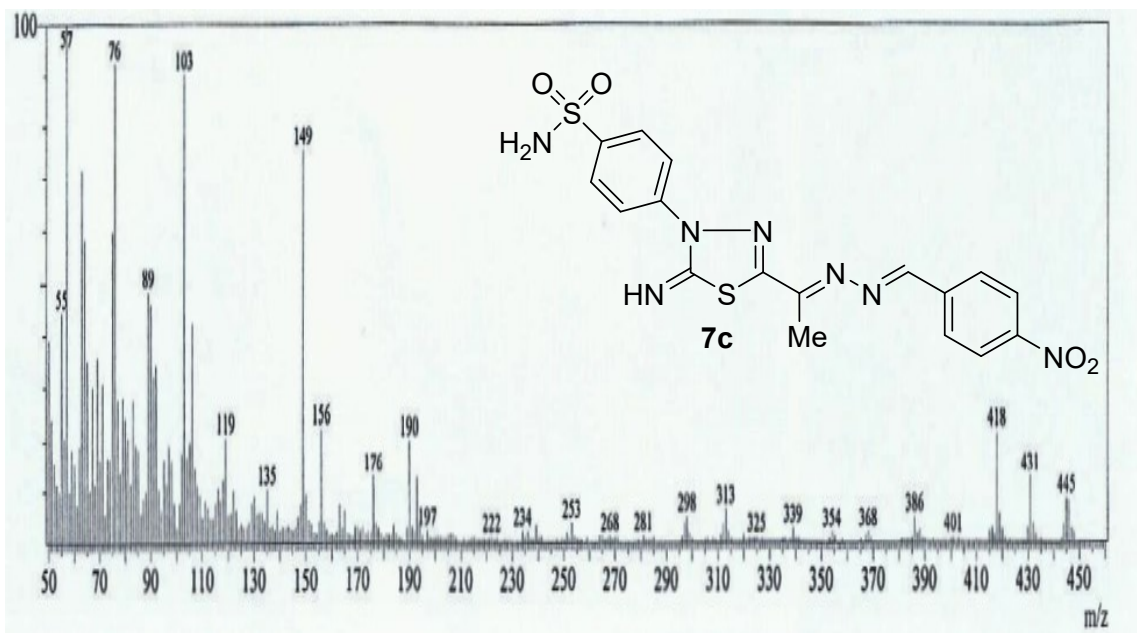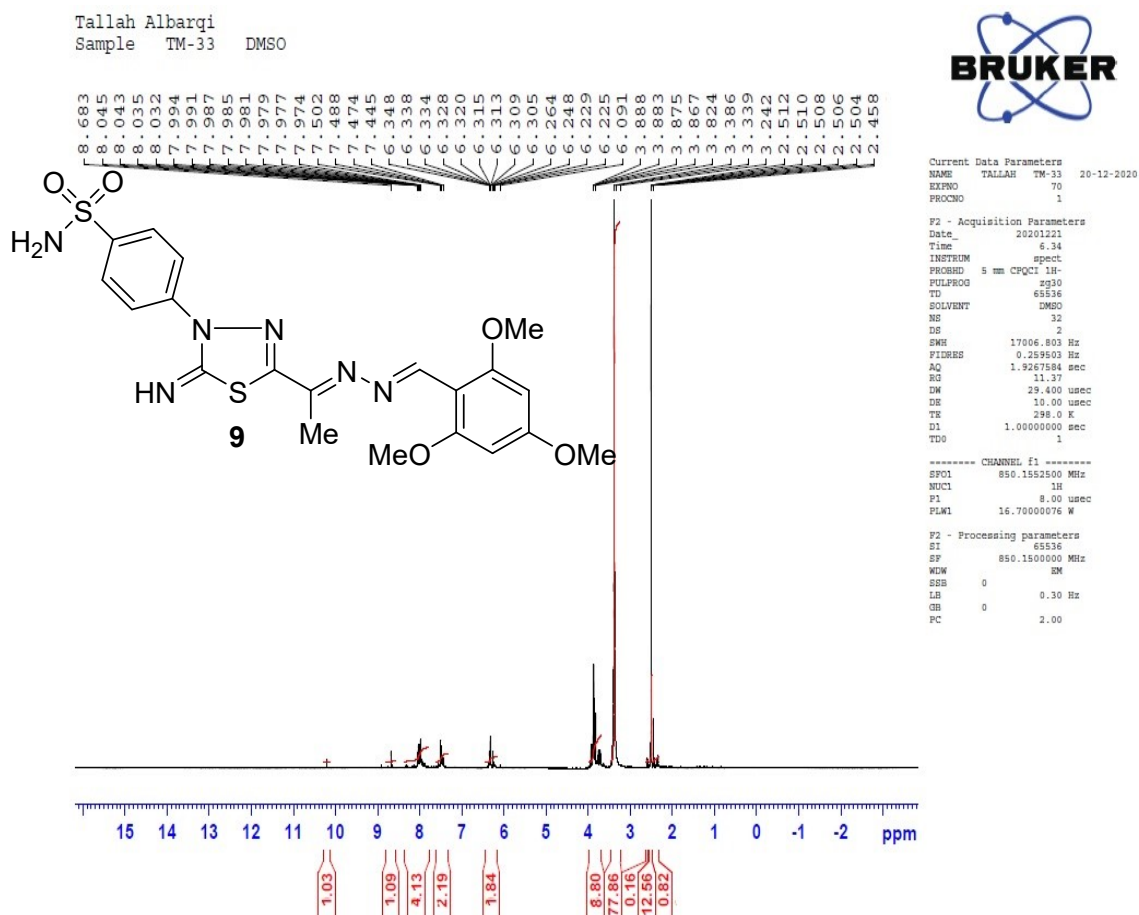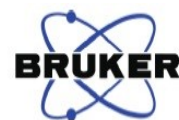

Current Data Parameters  
NAME TALLAH TM-33 20-12-2020  
EXPTNO 70  
PROCNO 1

F2 - Acquisition Parameters  
Date\_ 20201221  
Time 6.34  
INSTRUM spect  
PROBHD 5 mm CPQCI 1H-  
PULPROG zgpg  
TD 65536  
SOLVENT DMSO  
NS 32  
DS 2  
SWH 17006.803 Hz  
FIDRES 0.259503 Hz  
AQ 1.9267584 sec  
RG 11.37  
DM 29.400 usec  
DE 10.00 usec  
TE 298.0 K  
D1 1.00000000 sec  
TDO 1

----- CHANNEL f1 -----  
SP01 850.1552500 MHz  
NUC1 1H  
P1 8.00 usec  
PLM1 16.70000076 W

F2 - Processing parameters  
SI 65536  
SF 850.1500000 MHz  
WDW EM  
SSB 0  
LB 0.30 Hz  
GB 0  
PC 2.00

Tallah Albarqi  
Sample TM-33 DMSO

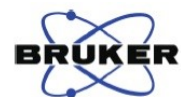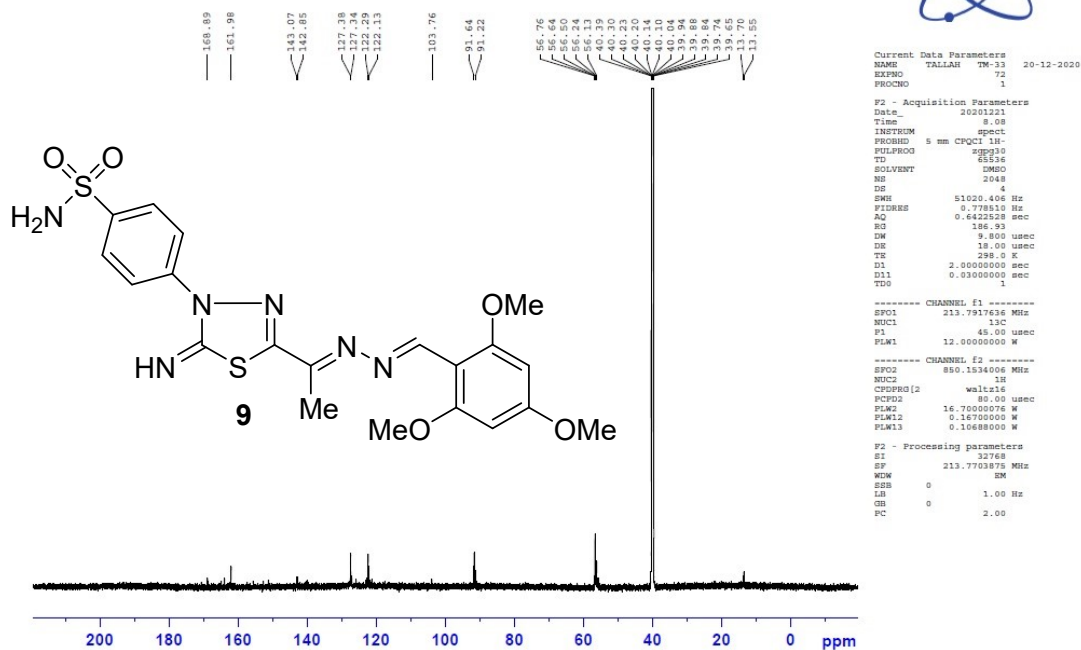

Figure S30. <sup>13</sup>C-NMR spectrum of compound 9.

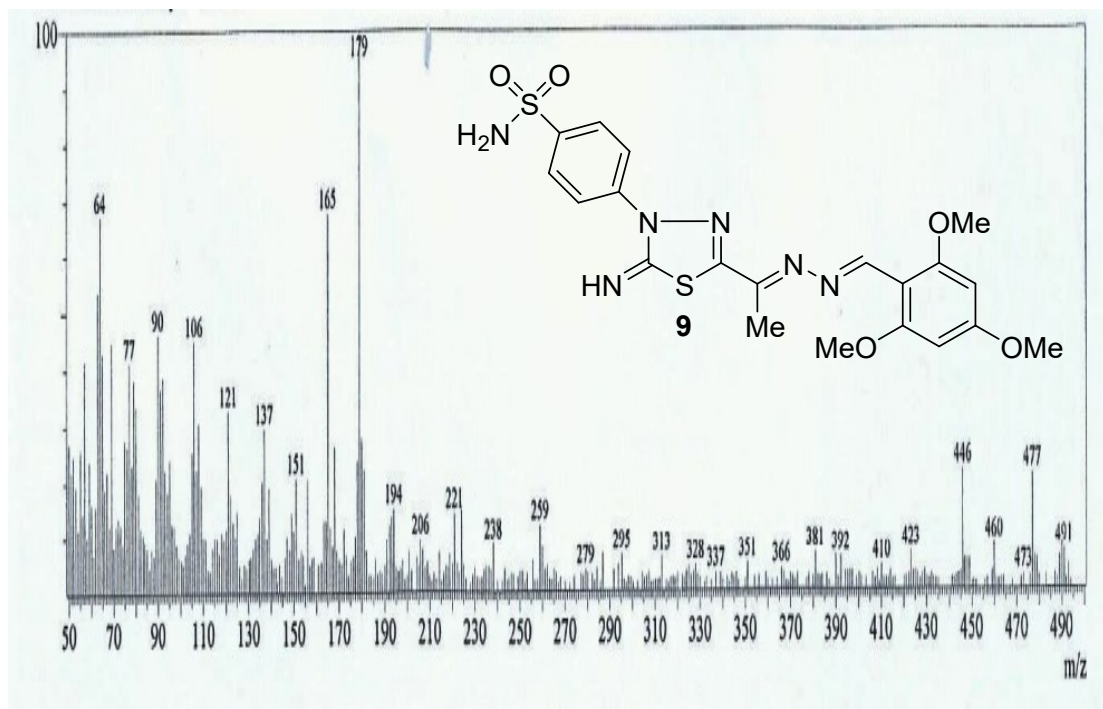

Figure S31. Mass spectrum of compound 9.



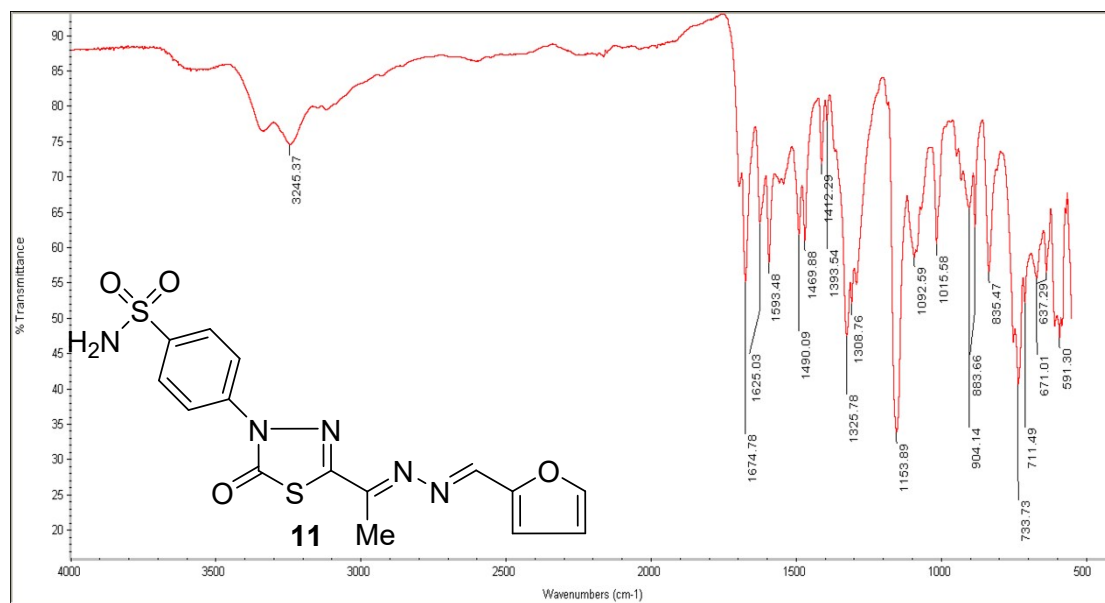

Figure S32. IR spectrum of compound **11**.

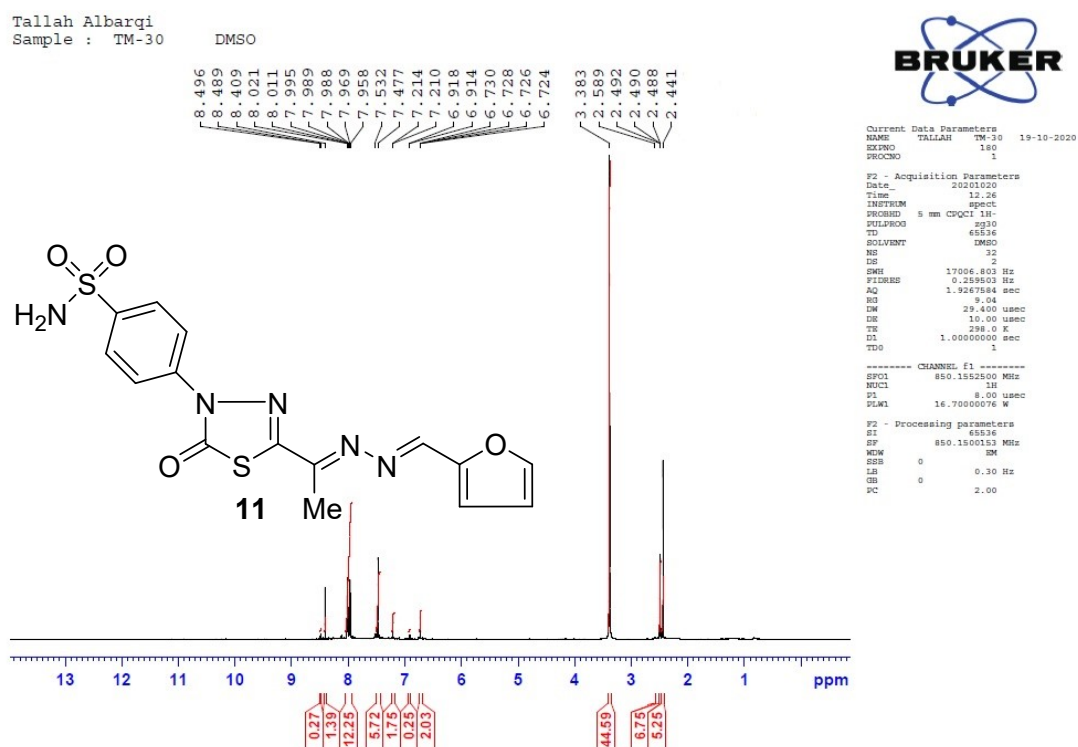

Figure S33. <sup>1</sup>H-NMR spectrum of compound **11**.

Tallah Albarqi  
Sample : TM-30

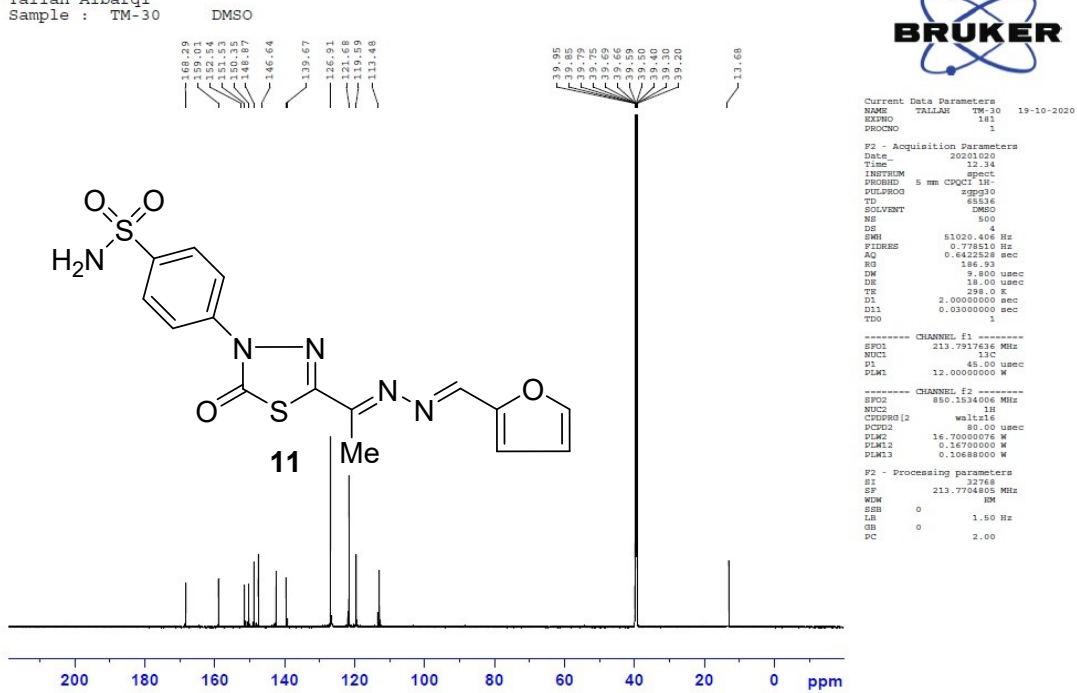

Figure S34. <sup>13</sup>C-NMR spectrum of compound 11.

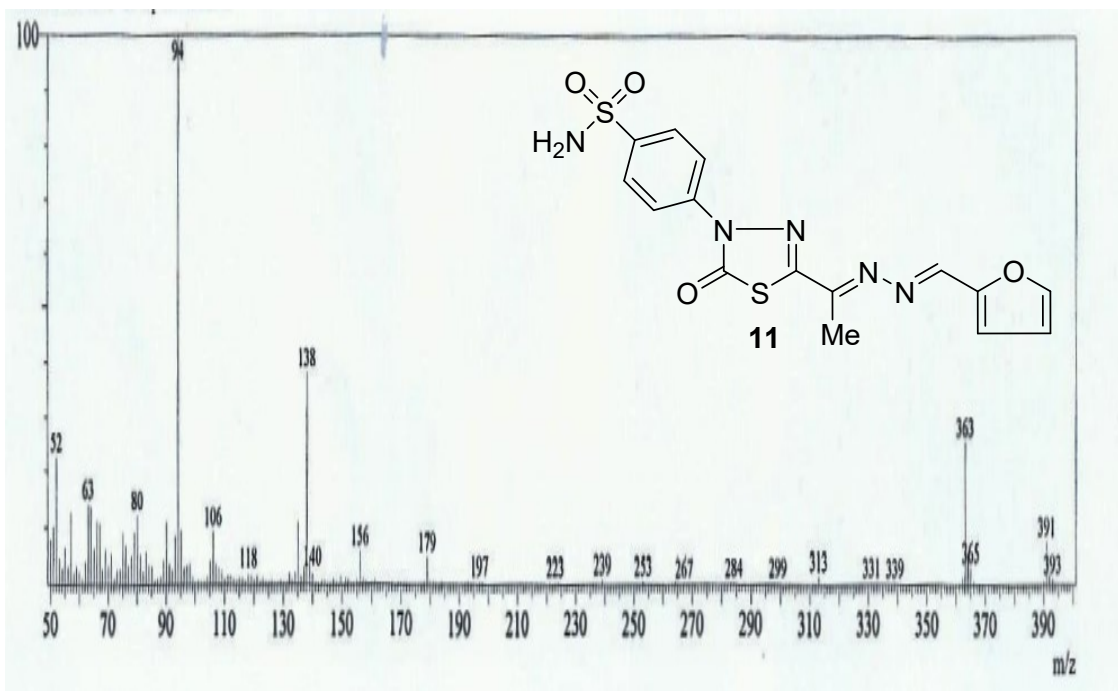

Figure S35. Mass spectrum of compound 11.

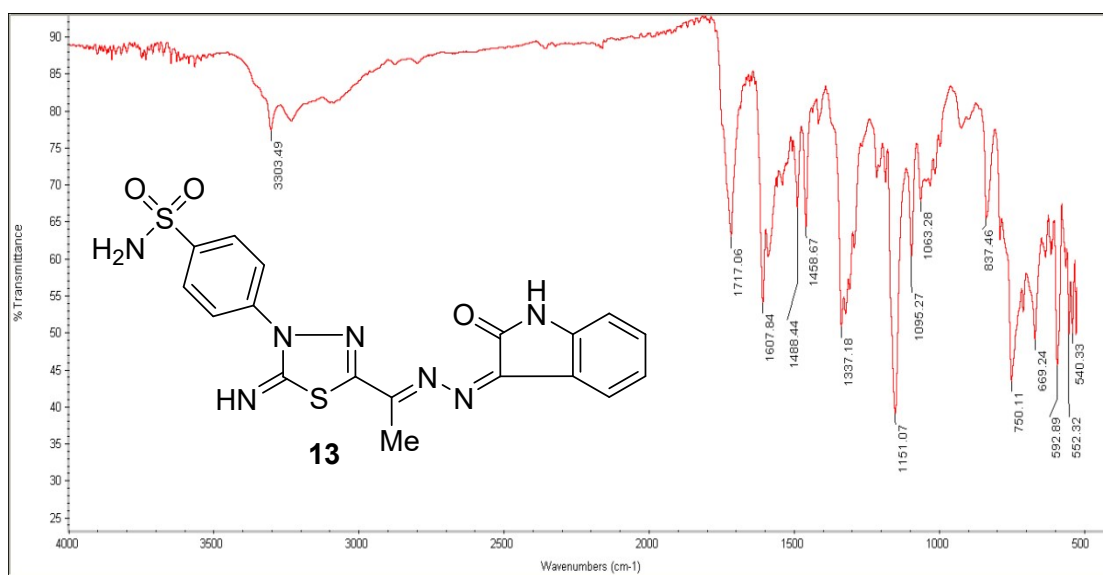

Figure S36. IR spectrum of compound 13.

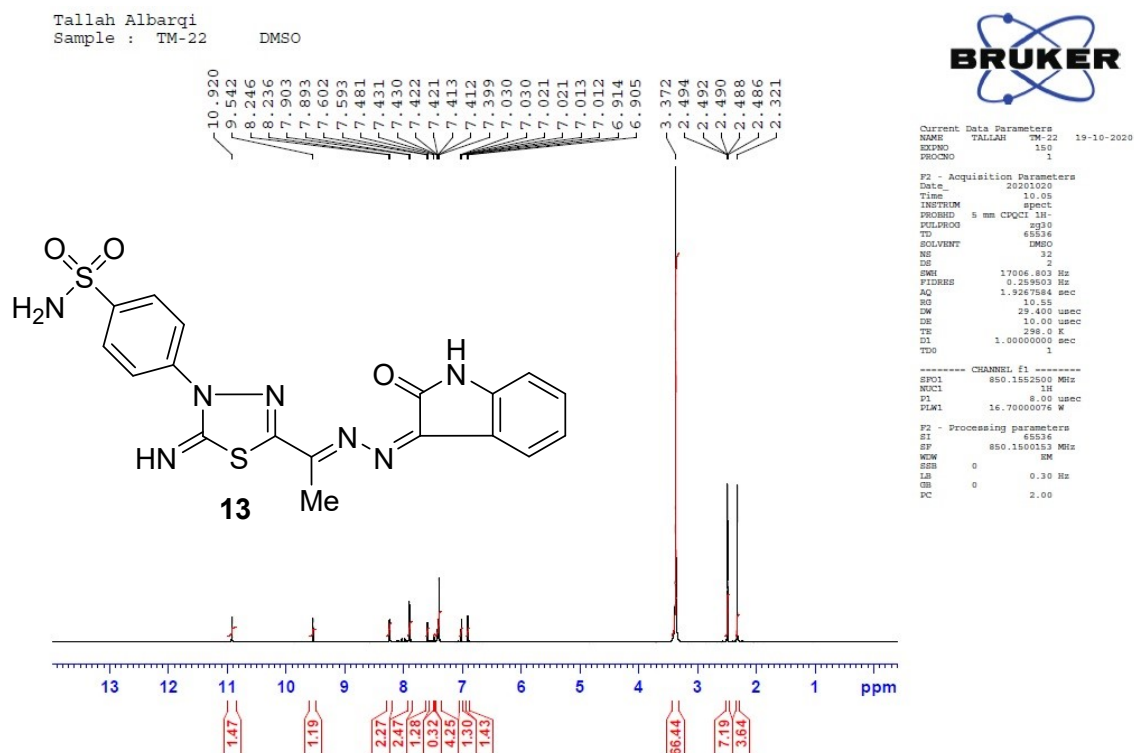

Figure S37. <sup>1</sup>H-NMR spectrum of compound 13.

Tallah Albarqi  
Sample : TM-22

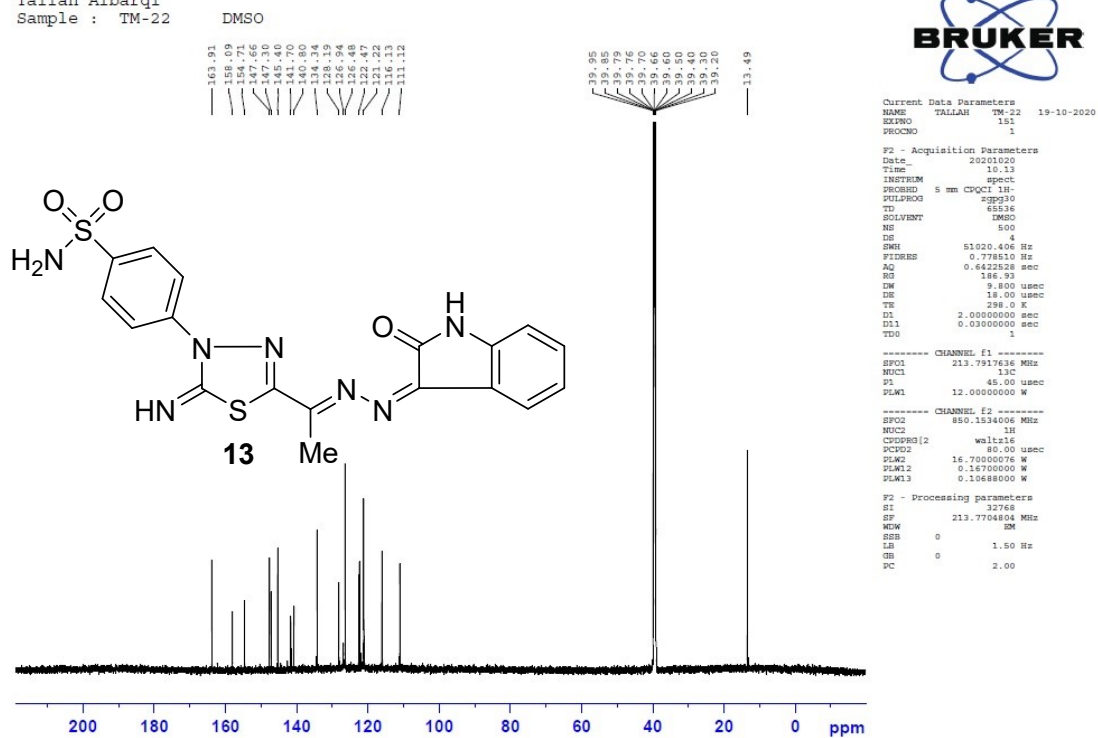

Figure S38. <sup>13</sup>C-NMR spectrum of compound **13**.

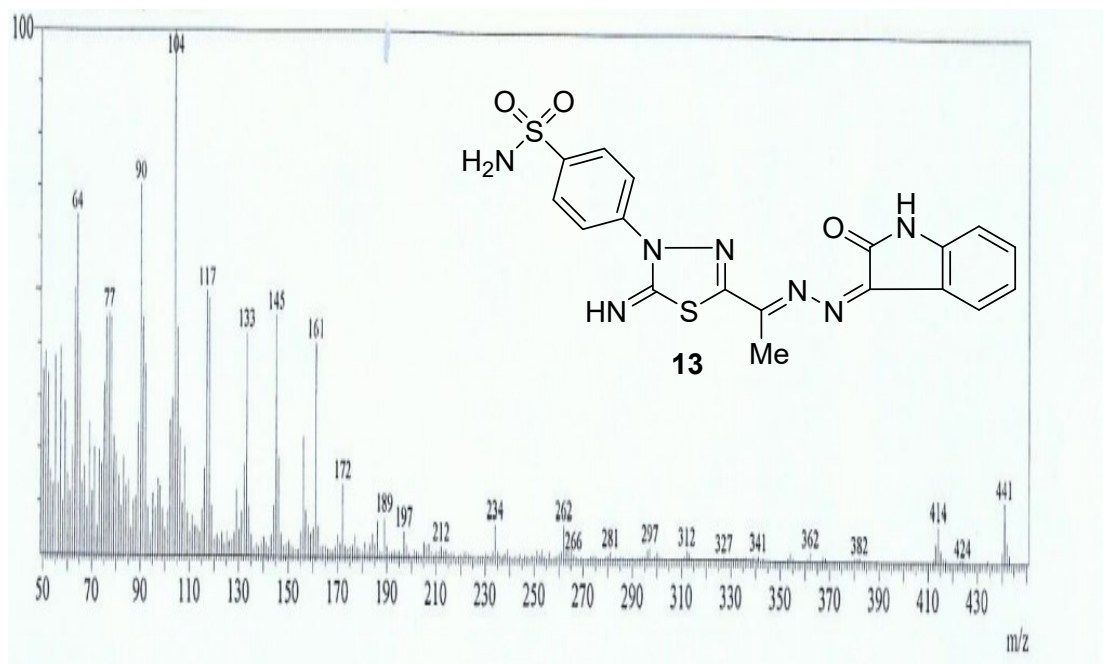

Figure S39. Mass spectrum of compound **13**.

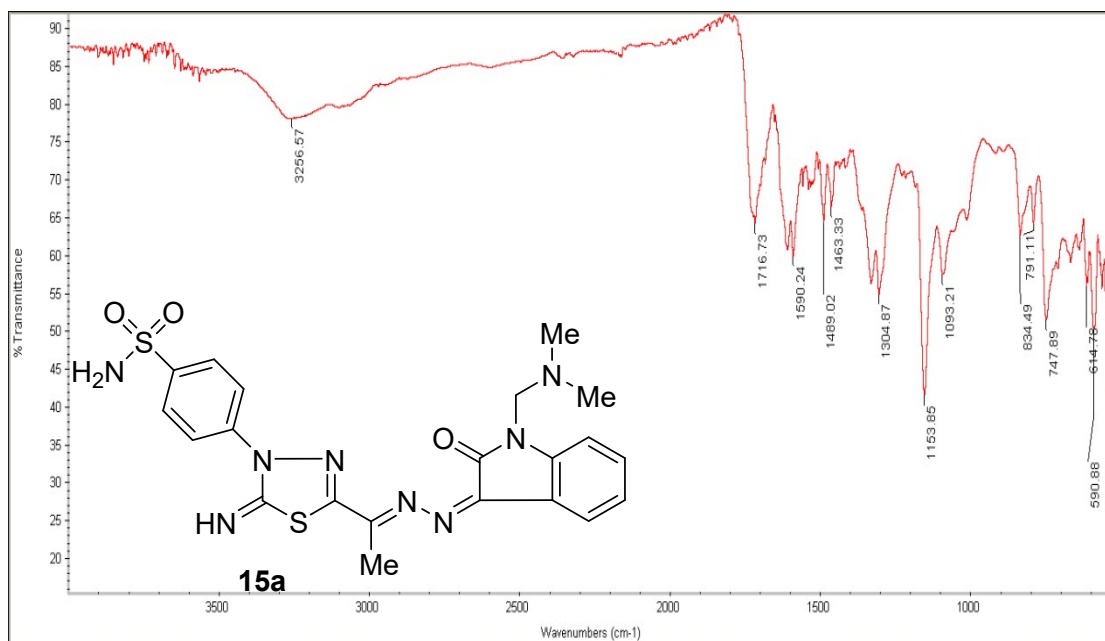

Figure S40. IR spectrum of compound 15a.

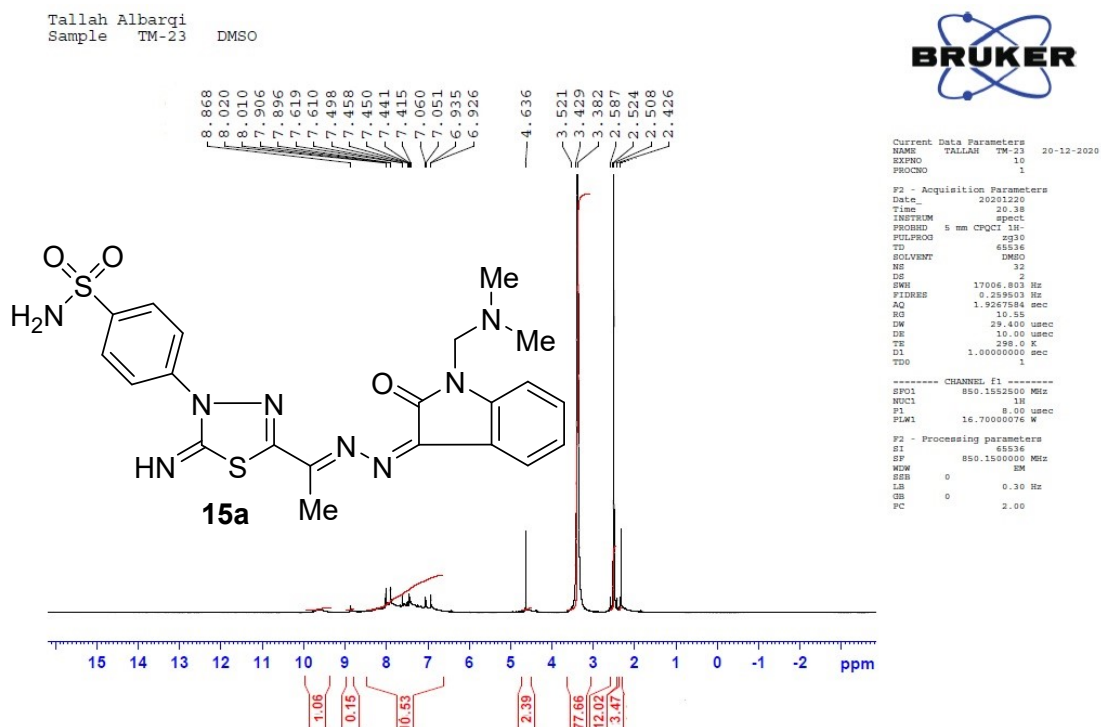

Figure S41. <sup>1</sup>H-NMR spectrum of compound 15a.

Tallah Albarqi  
Sample TM-23 DMSO

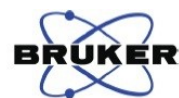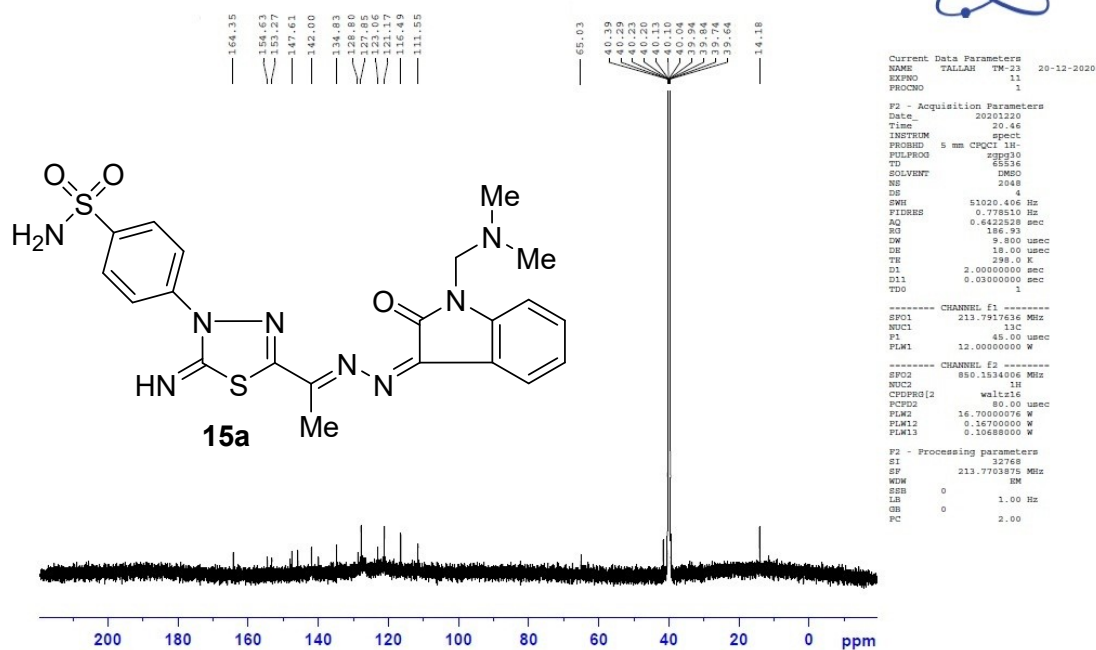

Figure S42. <sup>13</sup>C-NMR spectrum of compound 15a.

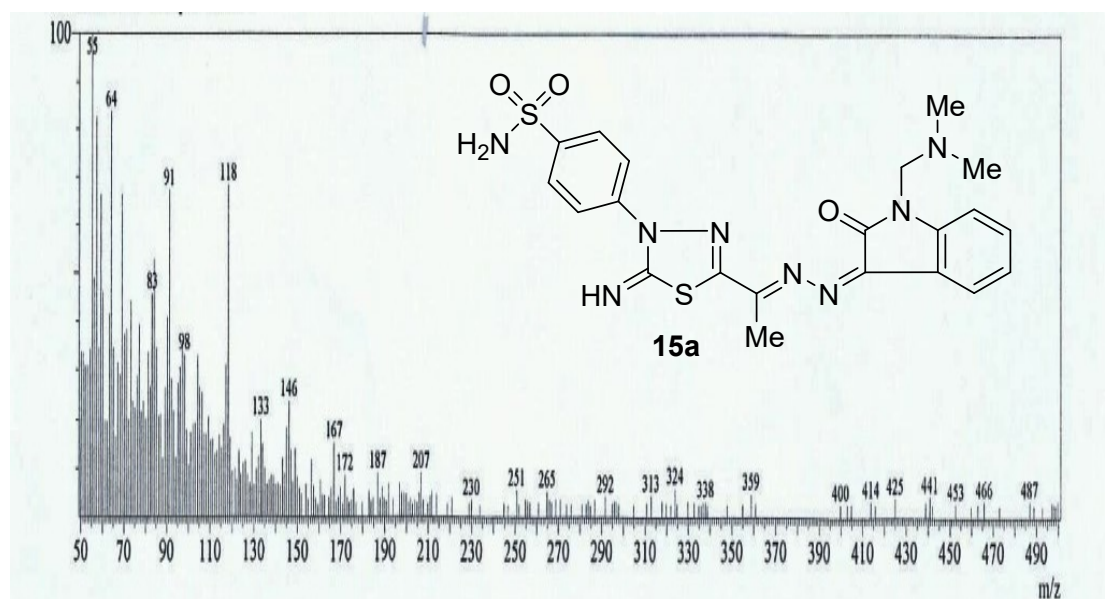

Figure S43. Mass spectrum of compound 15a.

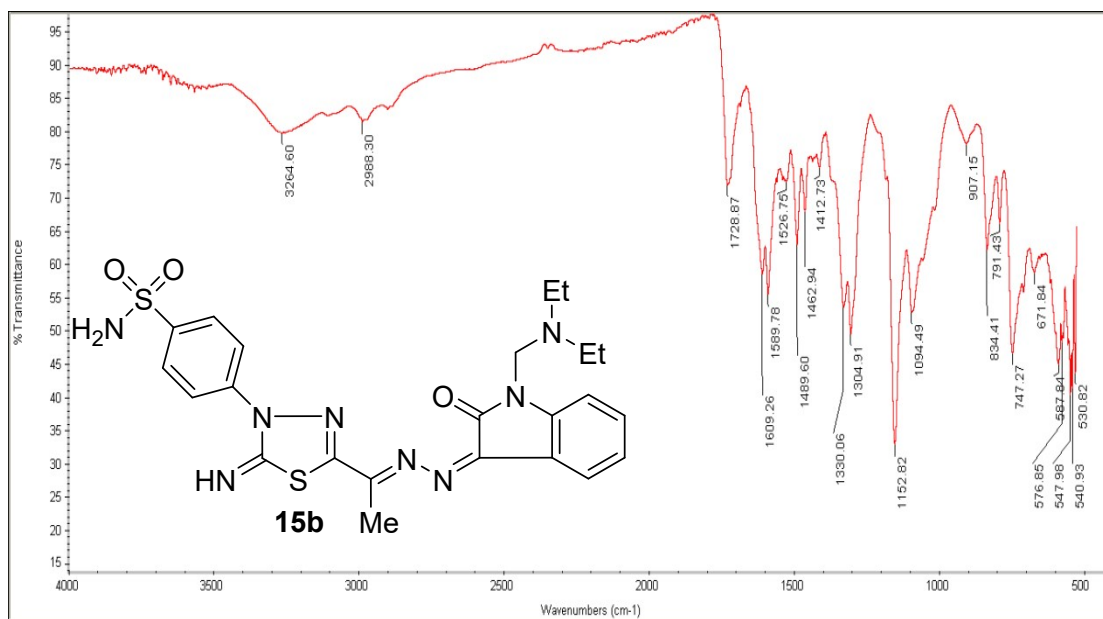

Figure S44. IR spectrum of compound **15b**.

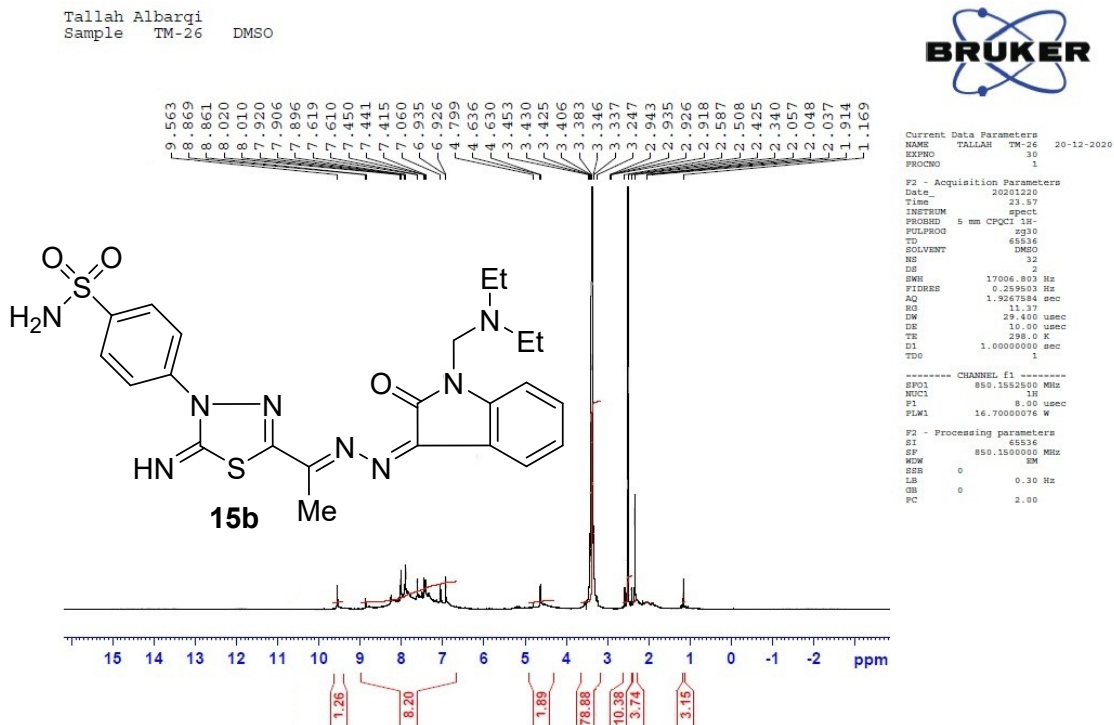

Figure S45.  $^1\text{H-NMR}$  spectrum of compound **15b**.

Tallah Albarqi  
Sample TM-26 DMSO

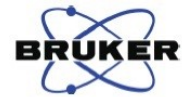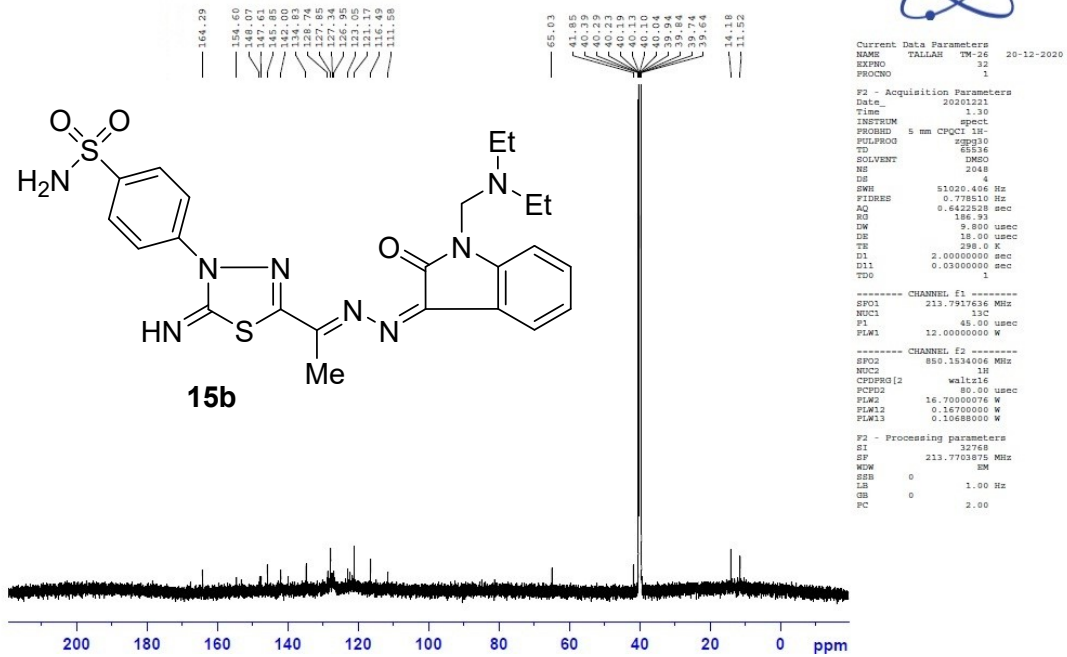

Figure S46. <sup>13</sup>C-NMR spectrum of compound 15b.

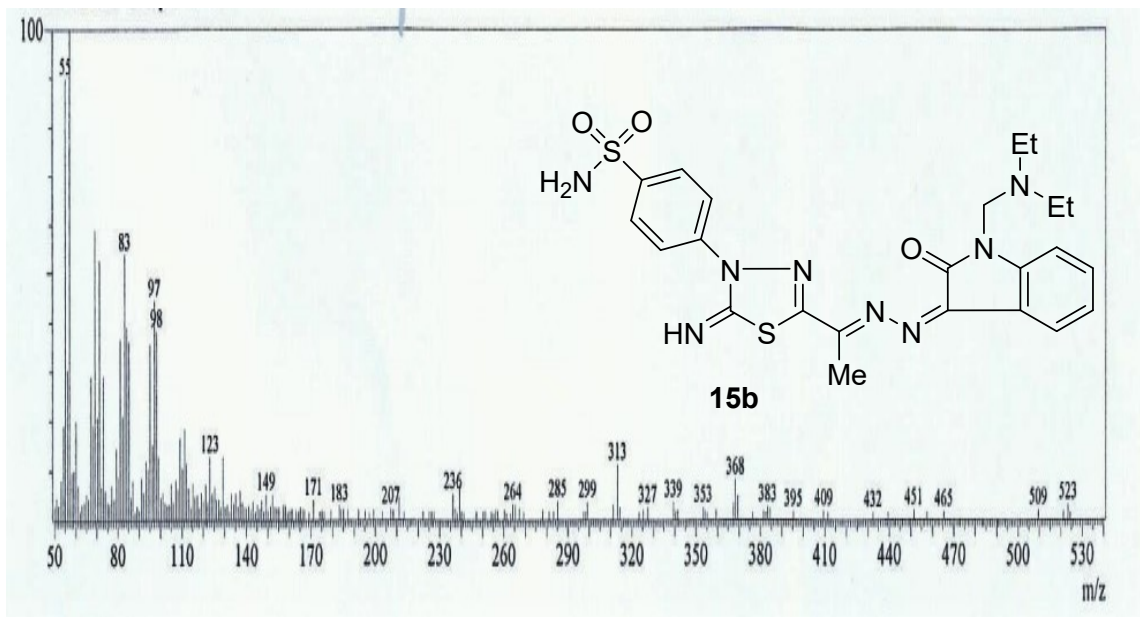

Figure S47. Mass spectrum of compound 15b.



**Table S1** Calculated<sup>a</sup> energies (E) and energy differences ( $\Delta E$ ) for possible configurations of the synthesized products.

| Cpd        | E (Hartree)                | $\Delta E$ (kcal/mol) <sup>b</sup> |                            |                            |
|------------|----------------------------|------------------------------------|----------------------------|----------------------------|
|            | <b>1 (EE)</b> <sup>c</sup> | <b>2 (ZZ)</b> <sup>c</sup>         | <b>3 (EZ)</b> <sup>c</sup> | <b>4 (ZE)</b> <sup>c</sup> |
| <b>7a</b>  | -2047.174609               | 5.27                               | 3.83                       | 3.81                       |
| <b>7b</b>  | -2066.621509               | 5.12                               | 3.81                       | 1.74                       |
| <b>7c</b>  | -2137.148645               | 5.60                               | 3.74                       | 2.06                       |
| <b>9</b>   | -2276.213429               | 5.75                               | 3.51                       | 1.77                       |
| <b>11</b>  | -1930.42554                | 2.68                               | 1.42                       | 1.60                       |
| <b>13</b>  | -2100.141412               | 3.28                               | 0.30                       | 0.79                       |
| <b>15a</b> | -2273.419471               | 3.26                               | 0.24                       | 0.73                       |
| <b>15b</b> | -2352.04409                | 3.29                               | 0.27                       | 0.75                       |

<sup>a</sup> The DFT-B3LYP functional combined with 6-31G(d) basis set were applied in these calculations.

<sup>b</sup> Energy differences ( $\Delta E$ ) are relative to the most stable configuration (**1**, EE),

<sup>c</sup> The optimized geometries of the proposed configurations for all synthesized compounds **7a-c**, **9**, **11**, **13**, **15a** and **15b** (Figures S3-S10 at supplementary material).
